# Supplementary material
Source: PubMed Central journal article supplement (PMC3724517)
Supplement: NIHMS431868-supplement-suppl.pdf [file NIHMS431868-supplement-suppl.pdf]

## Supplemental Materials and Methods:

### *Chemical agent and antibodies*

B-Raf inhibitor RAF265 [5-(2-(5-(trifluoromethyl)-1H-imidazol-2-yl)pyridin-4-yloxy)-N-(4-trifluoromethyl)phenyl-1-methyl-1H-benzp{D, }imidazol-2-amine] was kindly provided by Novartis Pharma AG and dissolved in solvent ethanol:propylene glycol:2.5% tween-80 (percentage 6:23:71) for oral delivery to mice by gavage. Antibodies to phospho-ERK1/2 Thr<sup>202</sup>/Tyr<sup>204</sup>(4370), phosphoMEK1/2(2338 and 9121), phospho-cyclin D1(3300), cyclin D1 (2978), PLK1 (4513) BIM (2933), BAX (2772), BCL2 (2876) were from Cell Signaling Technology. Additional antibodies for phospho-ERK1,2 detection for western blot were from Promega (V803A), and Santa Cruz (E-Y, SC7383). Total ERK antibody for western blot analysis was K-23 from Santa Cruz (SC-94). Ki67 antibody (ab833) was from ABCAM, Mcl1 antibody (559027) was from BD Biosciences, Factor VIII antibody was from Dako (A082), CD31 antibody was from Dianova, (DIA310), and Cot antibody was from Santa Cruz Biotechnology (sc-373677). For the cyclin D1 second antibody staining was with an Alexa Fluor 568 donkey anti-rabbit IgG (Invitrogen, A10042) (1:200 dilution). The pMEK1 fluorescence was developed using the Alexa Fluor 488 chicken anti-rabbit IgG second antibody (1:200 dilution). TUNEL staining kits were from Promega (G2350).

### *Mouse Implant Studies:*

Biopsy tissues were delivered to research laboratory in ice-cold Dulbecco's Modified Eagle Medium (DMEM) buffer solution. As the tissue mass available from each biopsy was limited, we first passaged the biopsy tissue in Balb/c nu/Foxn1 athymic nude mice (6-8 weeks of age and weighing 22-25g, purchased from Harlan Sprague Dawley, USA) to increase the volume of tumor for further implantation. Briefly, after eliminating necrotic or non-tumor tissue, the biopsy tissue was dissected into 3×3×3 mm pieces in a tissue culture dish and the tissue pieces were kept in ice-cold DMEM solution. Mice (5-10) were anesthetized by inhalation of 2.5% isoflurane (Baxter Healthcare Corporation, USA) through a nose cone. Mouse skin was sterilized with 7.5% Povidone-iodine (Betadine, Purdue Products L.P., USA) and a 6 mm incision was made in mouse flank skin followed by preparing a small pocket between the dermis and the underlying fascia. One or two tumor pieces were inserted into the subcutaneous pocket and the skin wound was closed by surgical clips. The analgesic, Burprenex (Reckitt & Colman Pharmaceuticals), was given once, intraperitoneally (i.p.) at 4.5 µg/kg body weight, after implantation. Antibiotic cream was applied daily to skin wounds for 5 days and the general health conditions were monitored regularly. Tumor size was measured by microcalipers weekly and when tumor size reached ~600 mm<sup>3</sup> (usually in 10-14 days), mice were euthanized by over-dose inhalation of isoflurane, tumors were collected and pooled in a cold DMEM solution and dissected into 3×3×3 mm tissue pieces. After washing in DMEM solution twice, each tumor piece was inserted into a surgically made pocket of subcutaneous tissue of a recipient nude mouse (passage 2) and wounds were closed. When tumor size reached ~100 mm<sup>3</sup>, the passage 2 nude mice were divided into 2 groups (minimum of 5 mice per group) and given RAF265, 40 mg/kg, or an equivalent volume of vehicle solvent, by oral gavage, once daily(QD). (Preliminary experiments using 10, 30 and 60 mg/Kg doses of RAF265 QD revealed significant weight loss at 60 mg/Kg and Phase I trials with humans with regionally advanced or metastatic cutaneous melanoma determined that a dose of 48mg/Kg QD was the MTD continuous dose of RAF265 (17). The tumor growth and mouse body weight were monitored once a week. After ~30 days of treatment (or less if tumors reached a diameter of 1.5cm, mice were sacrificed, tumors were collected for volume determination by fluid displacement, and divided for further studies. Response to therapy with RAF265 was defined as >50% reduction of tumor volume relative to vehicle-treated mice. All animal experiments were performed under guidelines of the Institutional Animal Care and Use Committee.

### *Preparation and Staining of Tissue Microarrays:*

Tissue sections of 6-µm thickness were cut for H&E staining. After the H&E stained slides were evaluated by the dermatopathologist, four tissue cores of 1 mm diameter from each paraffin block were punched and transferred manually to an assigned location in a Tissue Micro-Array (TMA) paraffin block module by using a TMA assembly instrument (Beecher Instruments Micro-Array Technology, USA). Punches from a set of control

paraffin blocks of human liver, kidney, lung, skin, and mouse liver, spleen, kidney, skin tissue were assembled into each TMA block. After heating to 37°C for 15 min, TMA blocks were cut into 6 µm sections which were then subjected to routine processing for immunohistochemical (IHC) staining. IHC staining with antibody against human phospho-ERK1/2 (Thr<sup>202</sup>/Tyr<sup>204</sup>) Ki67, Factor VIII, and CD31 was performed on TMA using the Vector ABC kit and NovaRED substrate kit. Immunofluorescence was used to examine pMEK1/2 (and cyclin D1 in TMAs. For the cyclin D1 second antibody staining was with Alexa Fluor 568 donkey anti-rabbit IgG (1:200 dilution). The pMEK1 fluorescence was developed using Alexa Fluor 488 chicken anti-rabbit IgG second antibody (1:200 dilution) TUNEL staining for apoptosis was also performed on TMAs.

#### *Quantification of Vascularity within Tumors:*

Immunohistochemistry for CD31 and Factor VIII was performed on all TMA's. Microvessel density in tumor cores was analyzed by an experienced veterinary pathologist blind to the TMA composition. Vessels were counted in each tissue core. For partial cores or cores with areas of tumor necrosis, counts were normalized based on the percentage of viable tumor tissue present in the core. The mean number of vessels for control and RAF265 treated cores was calculated for each patient TMA and comparisons were made between tumors from vehicle control treated and RAF265 treated mice. The mean vessel densities for control and RAF265 treatments were also compared between all responding tumors and all non-responding tumors.

#### *Genome-wide expression profiling of melanoma*

Briefly, RNA quality was first checked for chemical purity using a NanoDrop spectrophotometer (NanoDrop Technologies, Wilmington, DE, USA) and then assessed for RNA integrity by the Bioanalyzer (Agilent Technologies, Santa Clara, CA, USA). 100 ng of total RNA were amplified and labeled using the Affymetrix Whole-Transcript (WT) Sense Target Labeling Protocol and Affymetrix GeneChip Human Gene ST 1.0 arrays were hybridized with labeled sense DNA, washed, stained, and scanned according to manufacturer's instruction. Raw gene expression data (.cel files, Affymetrix human gene ST 1.0 platform) were pre-processed and normalized using the robust multi-array average (RMA) expression measure. Pre-processing was performed using the justRMA function of the bioconductor package affy (<http://www.bioconductor.org/packages/release/bioc/html/affy.html>). Expression values were in log<sub>2</sub> format after RMA. The R package limma of R2.10.0 statistics software was used to analyze differential expressions between drug-responding and non-responding tumors. Since there were multiple arrays (technical replicates) for a single sample, we estimated the correlation between technical replicates from a series of arrays, and applied the correlation information for linear modeling, and moderated paired t-statistics were computed by empirical Bayes shrinkage of the standard errors towards a common value. Winner probes were selected based on the following cutoffs: (1) fold change >2; (2) false discovery rate based on the moderated *t*-test followed by Benjamini and Hochberg's multiple-test adjustment <0.1; and (3) log odds ratio of differential expression (B statistic) >1. Pearson correlation coefficient was used to perform two-way unsupervised gene expression hierarchical cluster analysis on both samples. Results were shown in a heatmap by bioconductor R package Heatplus. In some analyses of differential gene expression among RAF265 responders versus non-responders the Hochberg's step-up method was used.

#### *Western Blot:*

Tumors from Raf265 and Vehicle-treated mice were excised and stabilized in RNA<sub>later</sub> (Ambion) according to the manufacturer's recommendations. To prepare protein lysates approximately 0.01g of each tumor tissue sample was homogenized in RIPA buffer containing protease and phosphatase inhibitors (Sigma). 15 µg of each protein lysate were loaded onto 10, 12 or 15% polyacrylamide gels, separated by SDS-PAGE and transferred onto nitrocellulose membranes. Membranes were blocked in 5% non-fat milk solution (Bio-Rad). Alternatively, 5% BSA (Sigma) was used as a blocking solution when phosphorylated proteins were analyzed. Membranes were incubated with appropriate

primary antibodies overnight and then with secondary antibodies for additional 2-24 hrs. HRP-conjugated goat anti-mouse and goat anti-rabbit secondary antibodies were obtained from Jackson ImmunoResearch. Light Chain specific HRP-conjugated goat anti-mouse IgG (Jackson ImmunoResearch) was used as a secondary antibody for detection of Cot. The levels of target proteins were examined by chemiluminescence (Cell Signaling Technology).

### Legends for Supplemental Figures:

**Supplemental Table S1.** Patient clinical characteristics. The data shown were collected in December 2010 for each of the patients that provided melanoma tumor tissue for this study.

**Supplemental Table S2.** Mutational profile of human melanomas. Mutational profile of 17 human melanoma tissues was performed by SNaPshot assay, which is designed to survey 43 common somatic point mutations in six genes (*BRAF*, *NRAS*, *KIT*, *GNAQ*, *GNA11*, and *CTNNB1*) potentially relevant to existing and emerging targeted therapies in melanoma.

**Supplemental Table S3.** Gene expression profiling differences between BRAF mutant versus BRAF WT melanoma tumors in this study.

**Supplemental Table 4.** Results from GSEA Analysis of gene expression data. Genes identified to exhibit enriched expression ( $p < 0.05$ ) in A. Genes with enriched expression in RAF265 responsive BRAF WT tumors compared to non-responsive tumors; B. Genes with enriched expression in RAF265 non-responsive BRAF WT tumors compared to responsive tumors; C. Genes with enriched expression in RAF265 responsive tumors compared to non-responsive tumors regardless of BRAF mutation status; D. Genes with enriched expression in RAF265 non-responsive tumors compared to responsive tumors regardless of BRAF mutation status;

**Supplemental Figure S1A.** Phospho-ERK expression analyzed by immunohistochemistry of tissue microarrays in human melanoma lesions taken directly from patients. The mean  $\pm$  SD of four biological repeats is shown. **Figure S1B.** Comparison of phospho-ERK staining on tissue microarrays from orthotopic implants of human melanoma lesions onto athymic nude mice. IHC staining of human phospho-ERK1/2 in implanted tissues treated with RAF265 or vehicle control as described in Methods. The mean  $\pm$  SD of four biological repeats is shown. No statistically significant difference in phospho-ERK staining was observed between control and RAF265 treatment implants for each melanoma biopsy tissue derived transplant tumors based upon the Student's t test. **Figure 1C.** Representative pERK staining of TMAs from tumor implants of mice treated with RAF265 or control diluent. The upper panel shows pERK for control treated (A), RAF 265 treated (B) tumor implants from responding patient V05 and the internal control skin (right upper panel). The lower panel shows pERK for control treated tumor implant (D), RAF265 treated tumor implant (E) from patient V12, with the right lower panel (F) showing the internal control pERK staining of skin.

**Supplemental Figure S2A.** Quantitative analysis of Ki67 staining of TMAs of melanoma tumor implants in mice treated or not treated with RAF265. **Figure S2B.** Quantitation of TUNEL staining of TMAs prepared from melanoma tumor implants growing in mice treated or not treated with RAF265. \* indicate values that are statistically different based upon a p value of  $\leq 0.05$ . **Figure S2C** Representative TUNEL staining. Green staining is indicative of apoptosis based upon the TUNEL assay. TMA cores from tumor implants of patient V19 treated with RAF265 (A-D), or

treated with vehicle control buffer (E-G), or normal skin control (H); TMA cores from tumor implants of patient V18 treated with RAF265 (I-L), or treated with vehicle control buffer (M-O), or normal skin control (P).

**Supplemental Figure S3:** Graphical depiction of growth curves of melanoma tumor implants in mice treated with RAF265 or Vehicle control. Tumors size was measured at least weekly as described in methods. Note: For V15, the control and RAF265 treated lines on the graph are superimposed.

**Supplemental Figure S4:** A. Ingenuity Pathway analysis of genes involved in cell development and cell growth in RAF265 responsive versus non-responsive tumors, irrespective of BRAF mutation status, B. Ingenuity Pathway analysis of genes involved in cancer in RAF265 responsive versus non-responsive tumors, irrespective of BRAF mutation status. C. Ingenuity Pathway analysis of genes involved in gene expression, connective tissue development and tissue morphology in RAF265 responsive versus non-responsive tumors, irrespective of BRAF mutation status. For A-C, Red indicates genes with enhanced expression in RAF265 responders and Green indicates genes with reduced expression in RAF265 responders.

**Supplemental Figure S5.** Representative IHC of TMAs showing Factor VIII staining in V28 vehicle control treated tumors (A, 20X; B, 40X) and V28 RAF265 treated tumors (C, 20X, D, 40X, E, 40X from another field). Staining was developed with DAB and Factor VIII positive staining is brown. No significant differences were observed in the vasculature based upon the staining pattern, though the RAF265 tumors frequently showed areas of reduced cellularity as noted in C and D. The insert at the bottom shows the quantitation of vessels within each core, citing the mean number of vessels per core based upon CD31 and Factor VIII staining. For responders the number of cores evaluated for control=38 and for RAF265 treated is=35 ; For non-responders the n for control =55 and for Raf265 treated =70. Data are recorded as mean  $\pm$  STDEV.

**Supplemental Figure S6:** A. Pathway analysis of genes involved in cancer, cell death, cell growth and proliferation shown by GSEA analysis to be enriched in BRAFWT tumors that were non-responders to RAF265. B. Pathway analysis of genes involved in cellular movement, cancer and cell cycle shown by GSEA analysis to be enriched in tumors (both BRAF mutant and WT) that were non-responders to RAF265, C. Pathway analysis of genes involved in cell cycle, cell growth and proliferation, DNA replication, recombination and repair shown by GSEA analysis to be enriched in tumors (both BRAF mutant and WT) that were non-responders to RAF265.

# Supplemental Figure S1

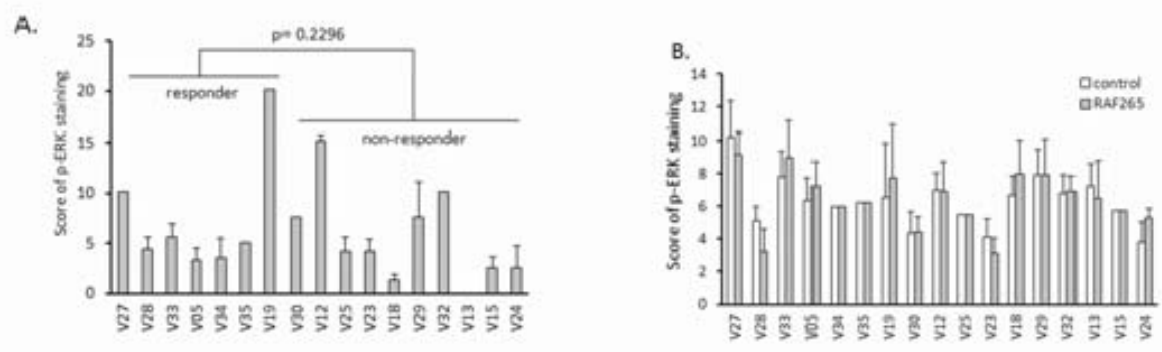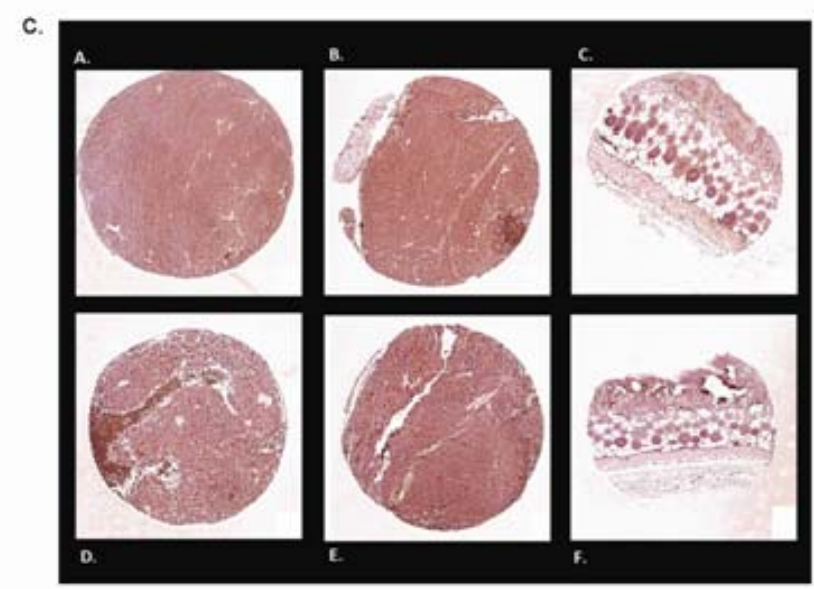

Supplemental Figure S2

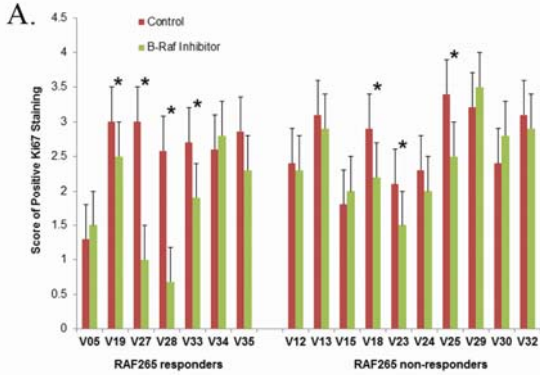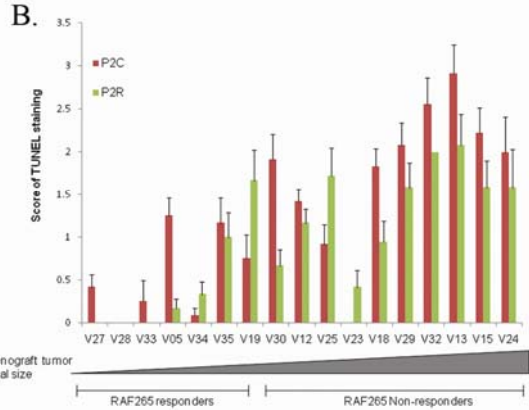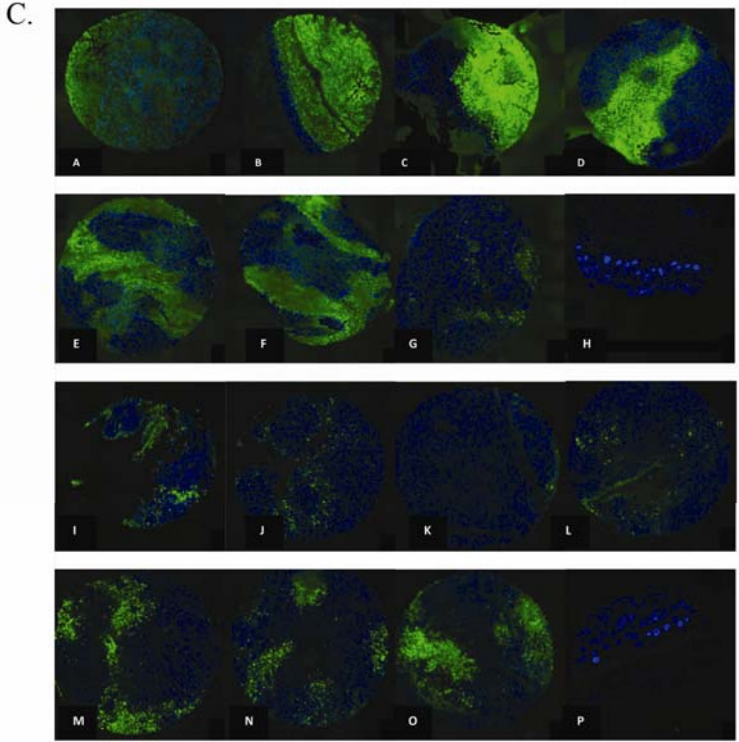

### Supplemental Figure S3

V05P3 (RAF265 vs. Control)

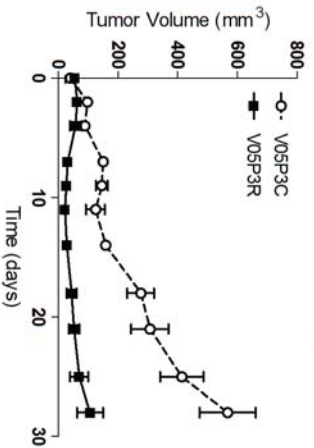

V09P2 (RAF265 vs. Control)

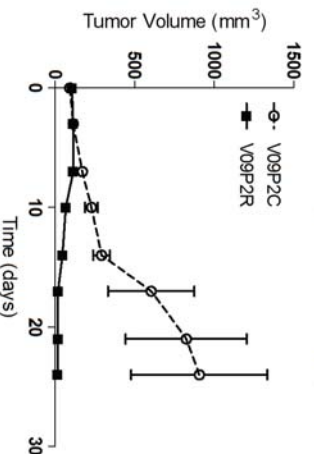

V12P2 (RAF265 vs. Control)

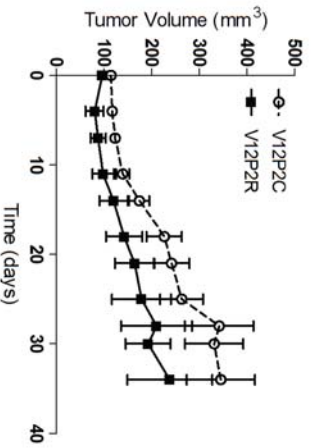

V13P2 (RAF265 vs. Control)

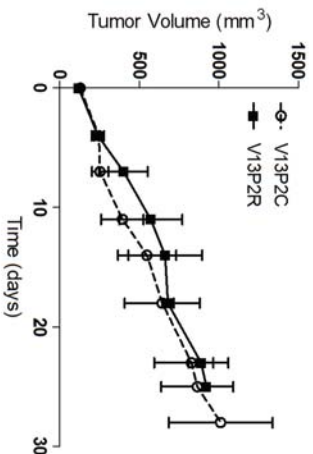

V15P2 (RAF265 vs. Control)

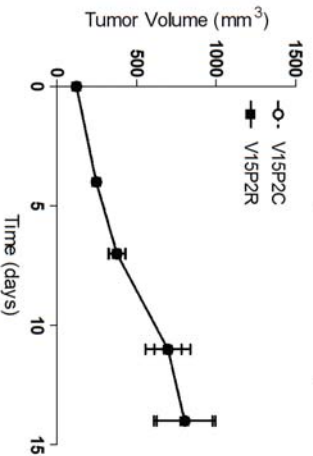

V18P2 (RAF265 vs. Control)

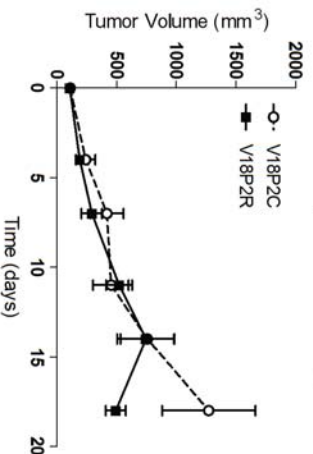

V19P2 (RAF265 vs. Control)

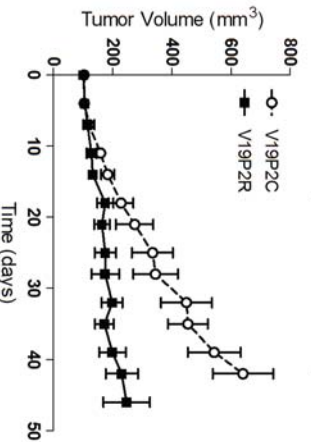

V23P2 (RAF265 vs. Control)

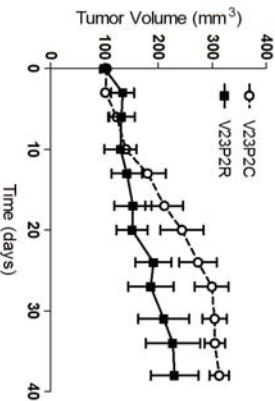

### S3 continued

V24P2 (RAF265 vs. Control)

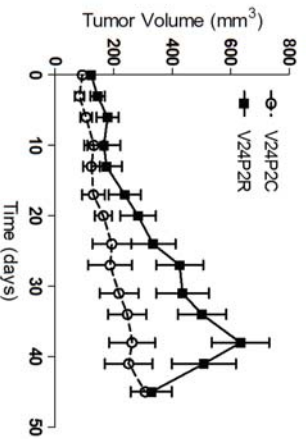

V25P2 (RAF265 vs. Control)

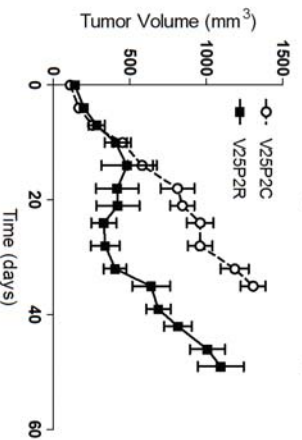

V26P2 (RAF265 vs. Control)

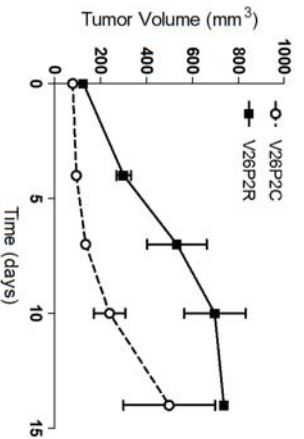

V27P2 (RAF265 vs. Control)

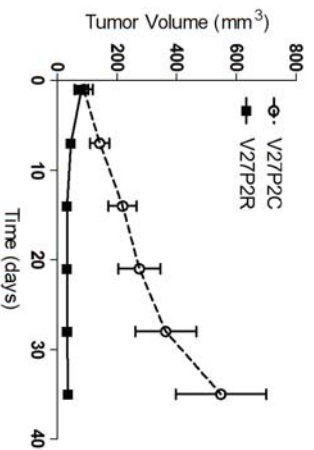

V28P2 (RAF265 vs. Control)

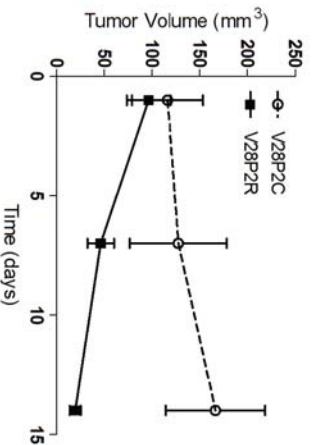

V29P2 (RAF265 vs. Control)

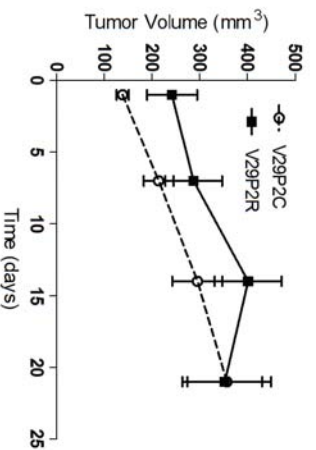

V30P2 (RAF265 vs. Control)

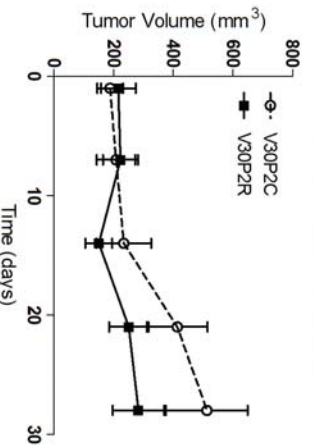

V32P2 (RAF265 vs. Control)

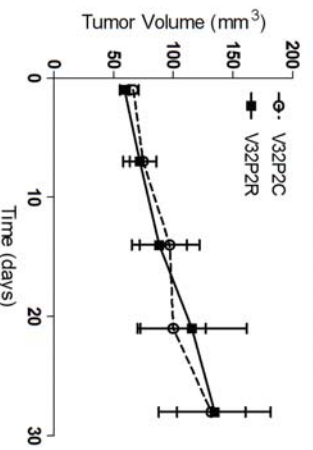



### S3 Continued

V33P2 (RAF265 vs. Control)

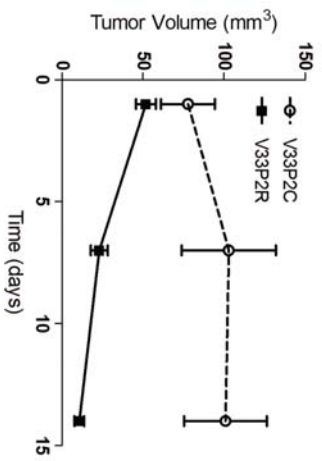

V34P2 (RAF265 vs. Control)

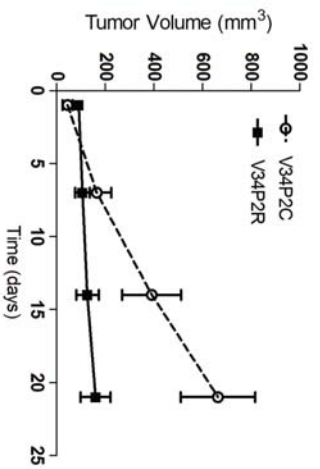

V35P2 (RAF265 vs. Control)

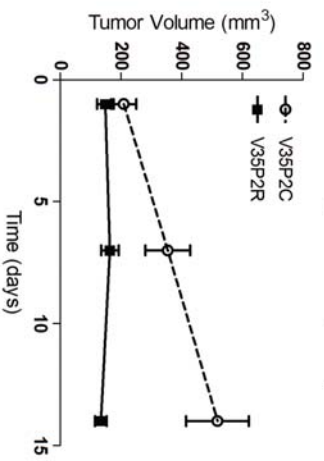

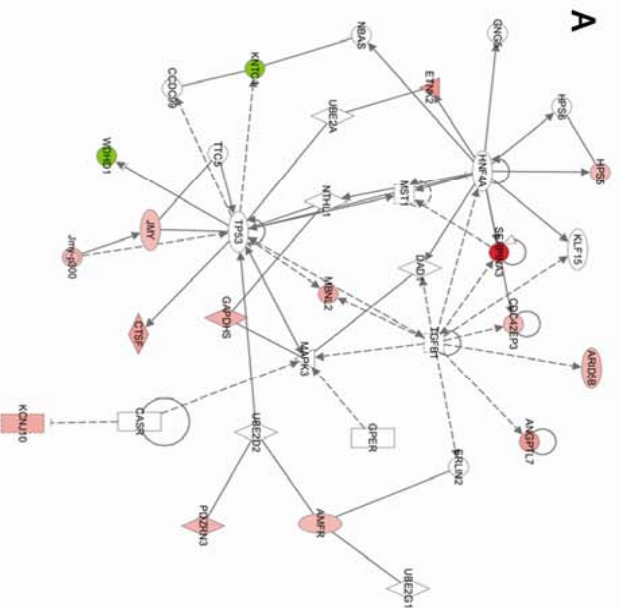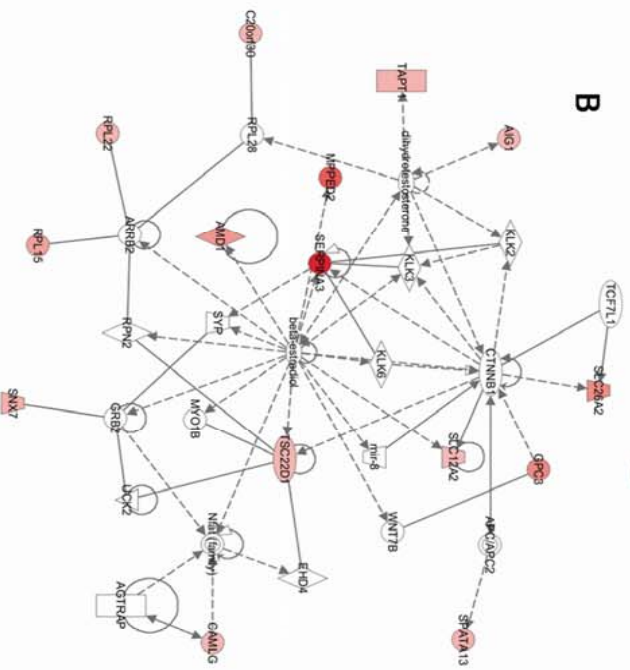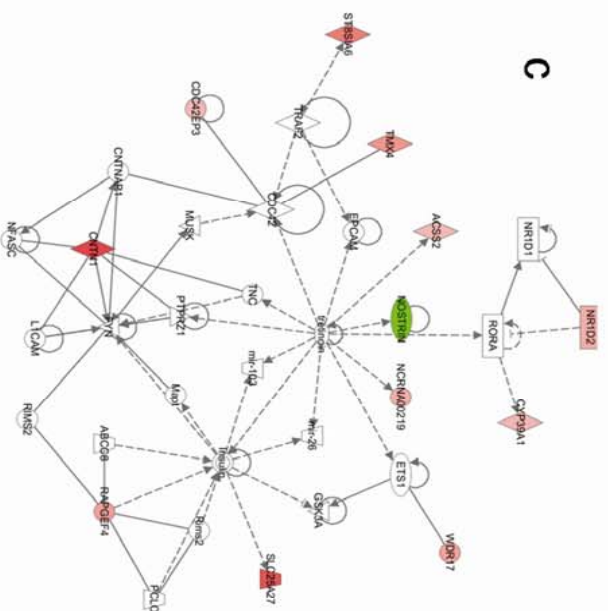

**Supplemental Figure S5:**

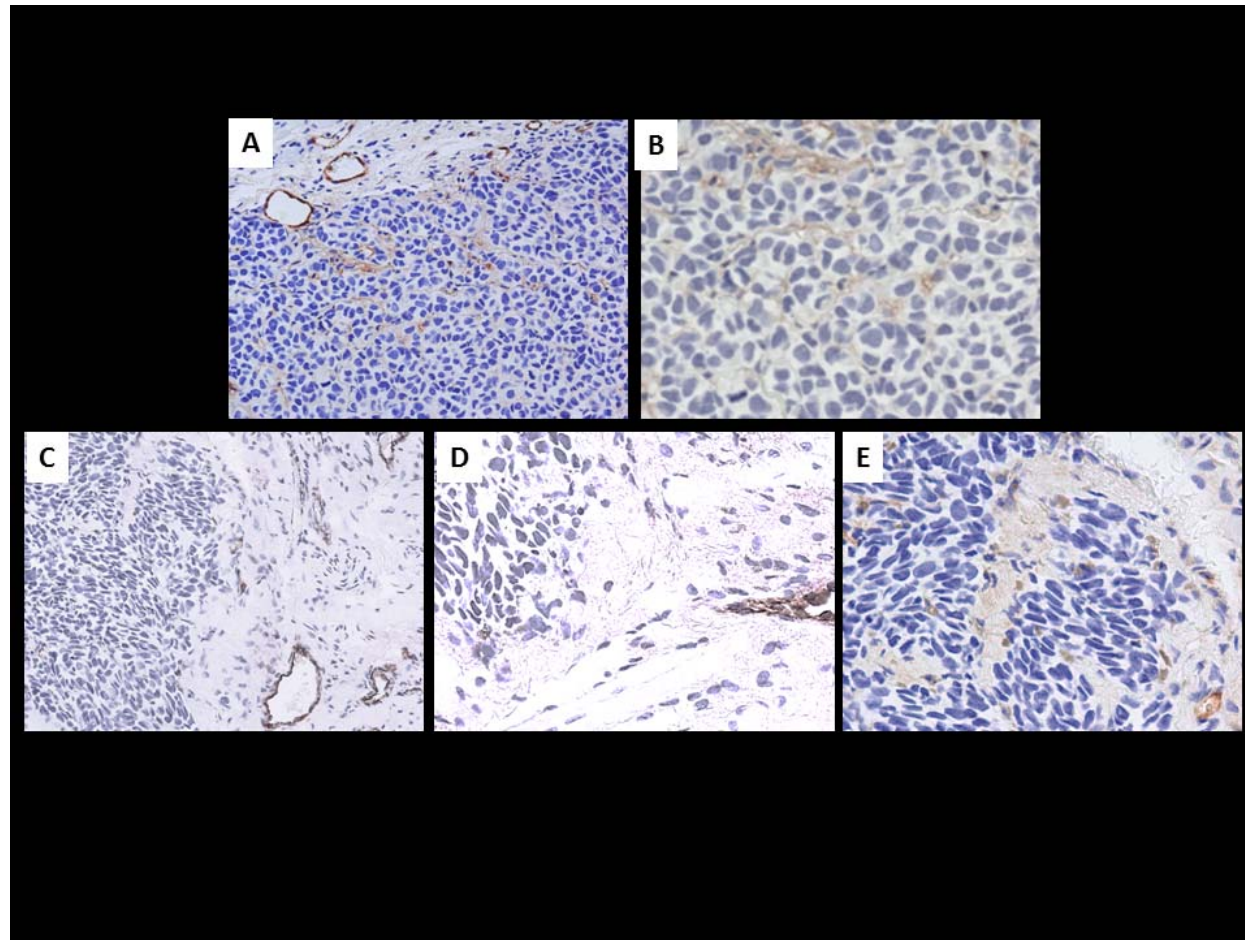

| <b>RAF-265 Responders</b>      |                       | <b>RAF-265 Non-Responders</b>  |                        |
|--------------------------------|-----------------------|--------------------------------|------------------------|
| <b>Mean Vessel Number/Core</b> |                       | <b>Mean Vessel Number/Core</b> |                        |
| <b>Vehicle Control</b>         | <b>RAF265 Treated</b> | <b>Vehicle Control</b>         | <b>RAF-265 Treated</b> |
| <b>22</b>                      | <b>27</b>             | <b>26</b>                      | <b>25</b>              |

**Supplemental Figure 6A. Genes Identified by GSEA Analysis as Enriched in RAF265 Non-Responding BRAF<sup>WT</sup> Tumors: Pathways Related to Cancer, Cell Death, Cell Growth and Proliferation**

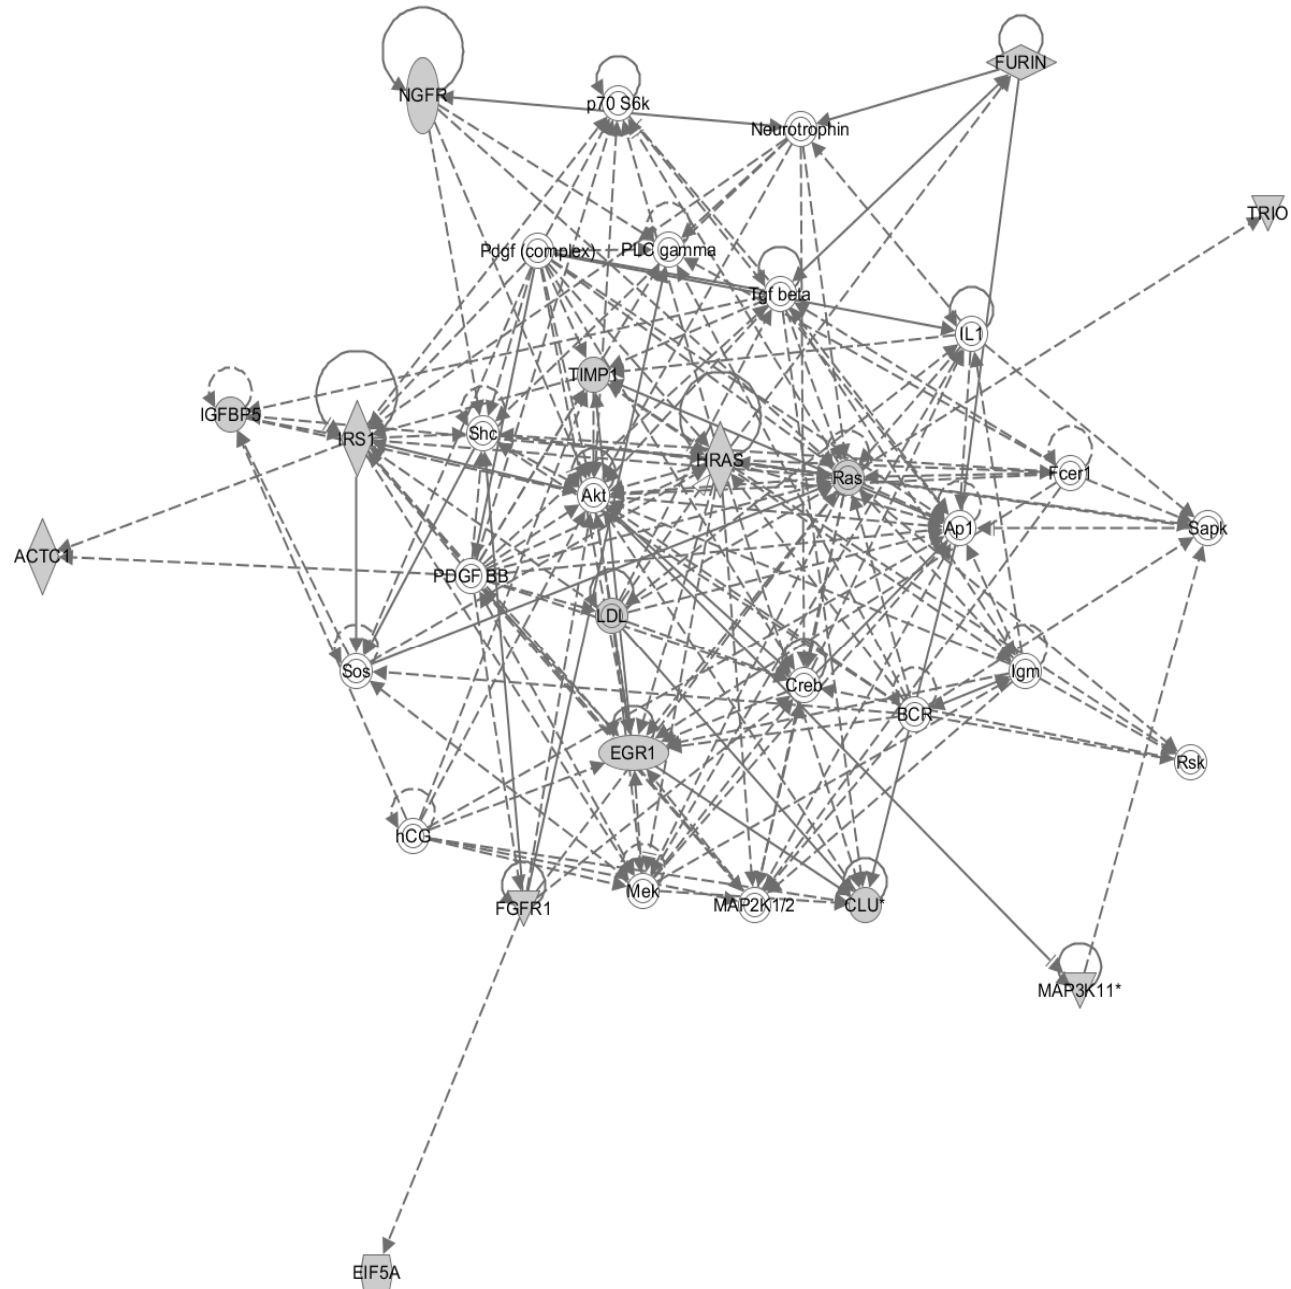

**Supplemental Figure 6B. Genes Identified by GSEA Analysis as Enriched in RAF265 Non-Responding Tumors Regardless of BRAF Mutation Status: Pathways Associated with Cell Movement, Cancer and Cell Cycle**

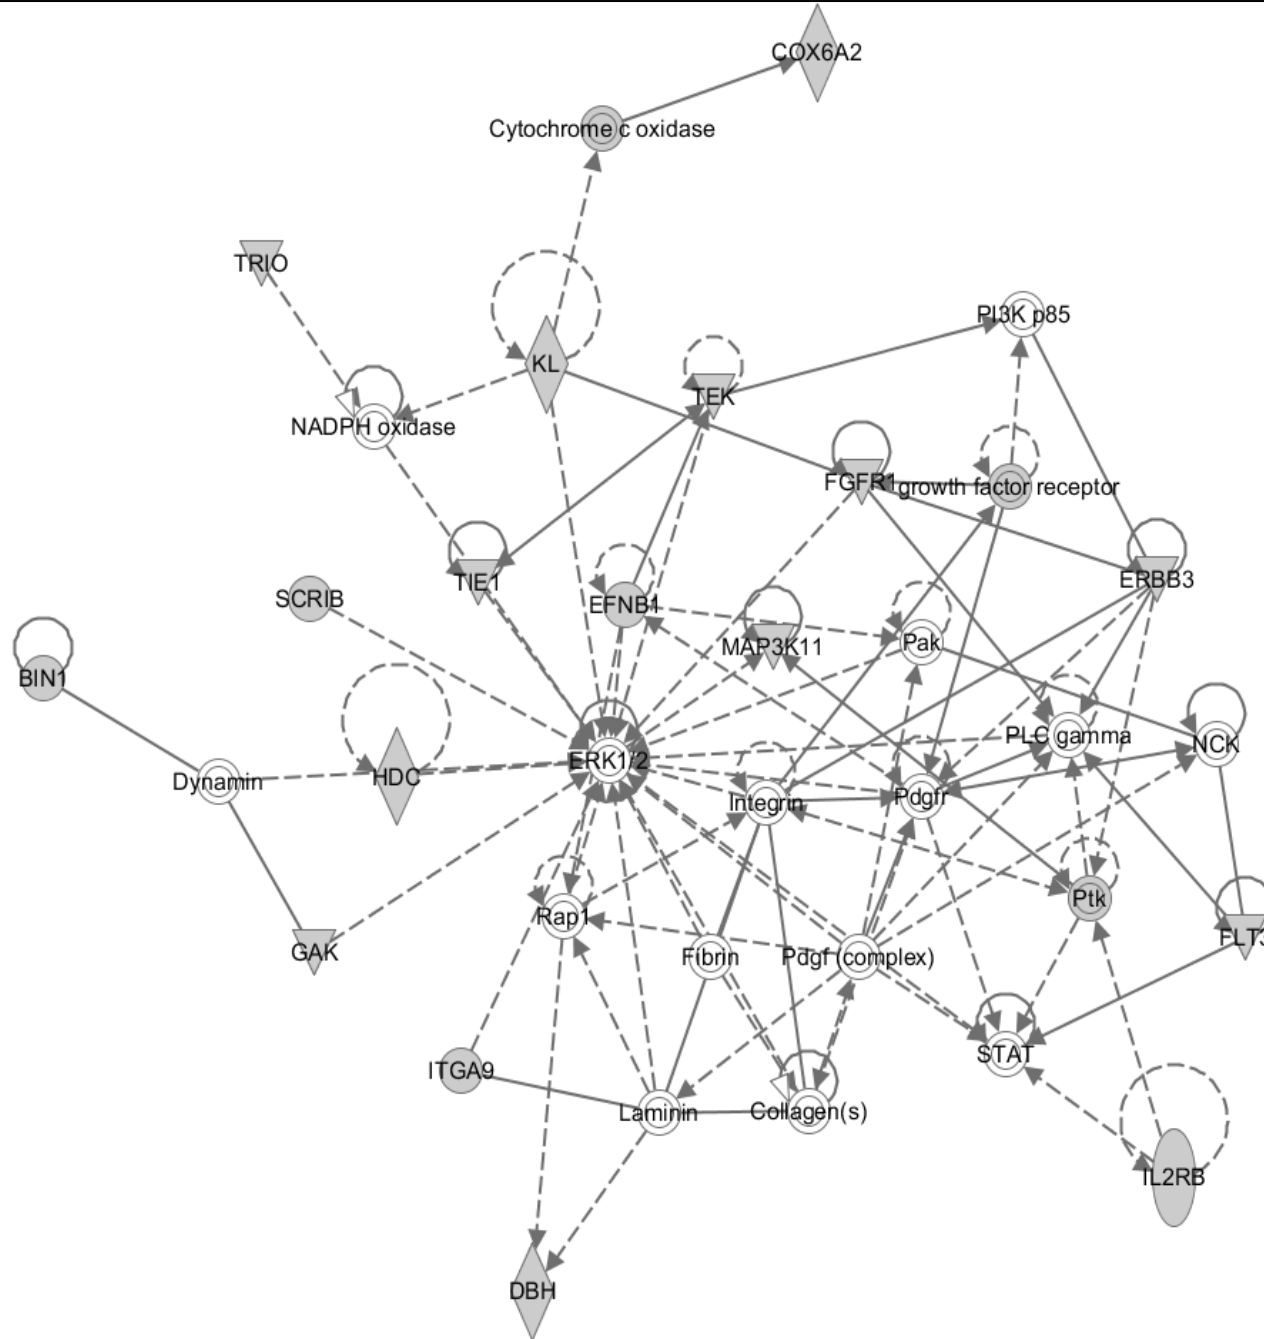

**Supplemental Figure 6C. Genes Identified by GSEA Analysis as Enriched in RAF265 Non-Responding Tumors Regardless of BRAF Mutation Status: Pathways Associated with Cell Cycle, Cell Growth/Proliferation, DNA Replication, Recombination and Repair**

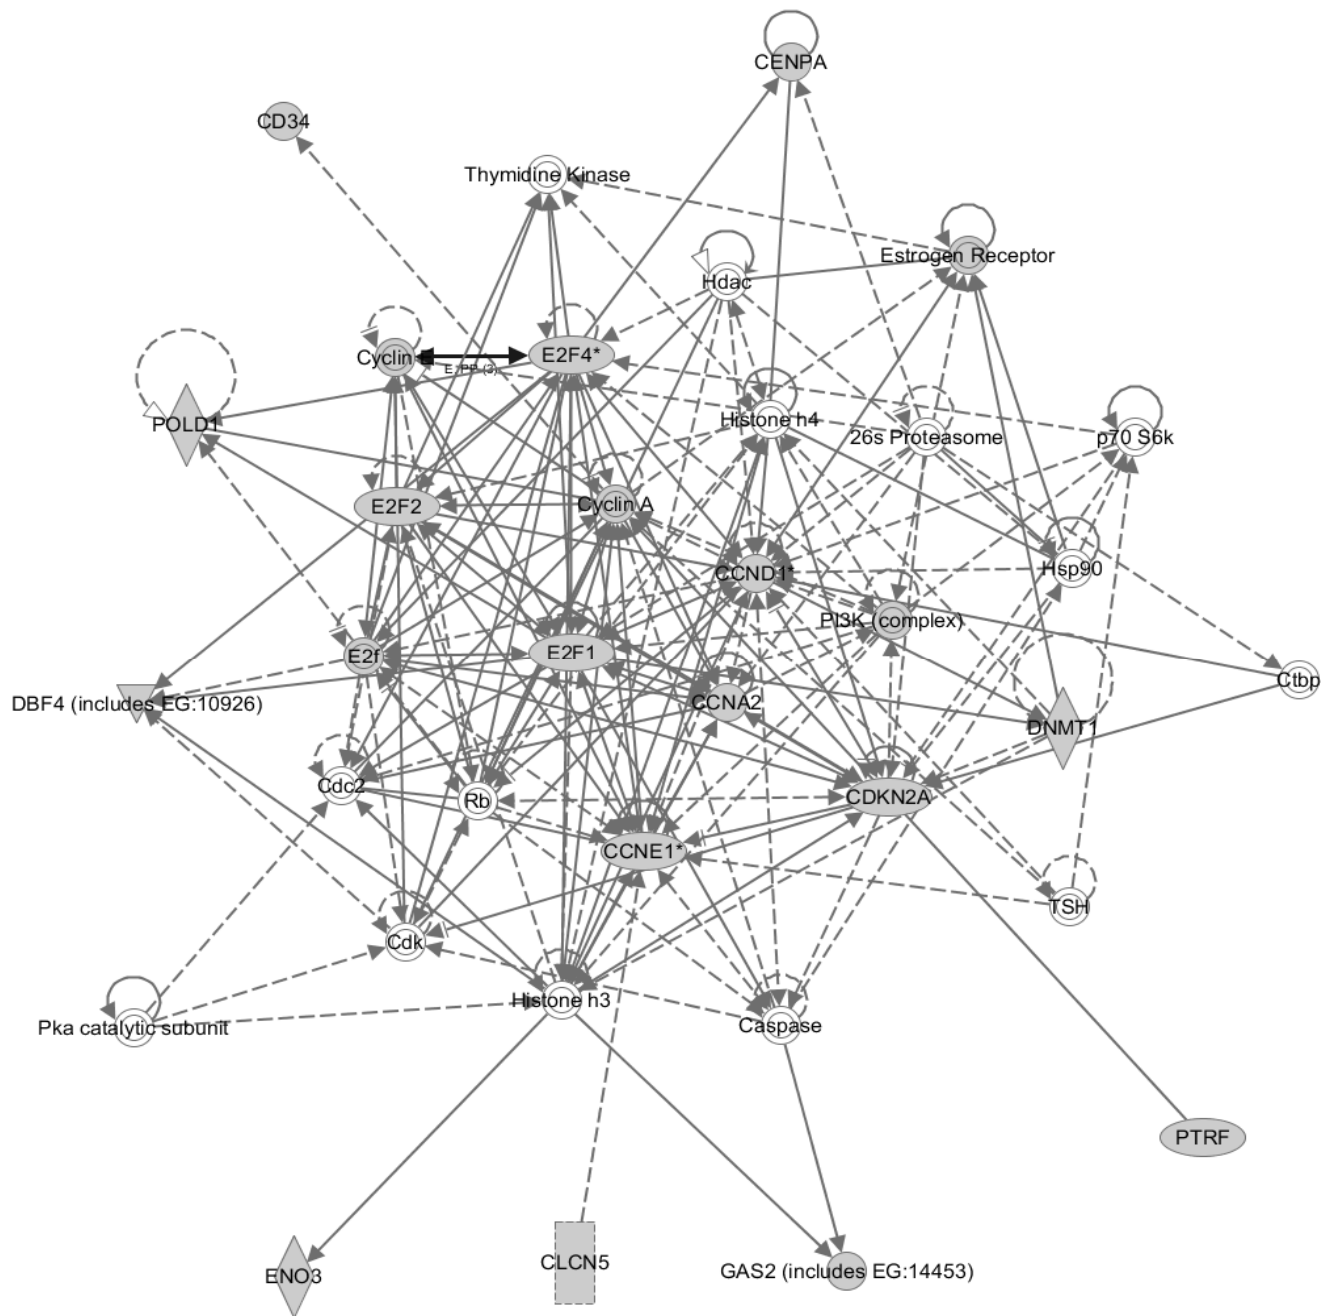

**Supplemental Table 1: Patient Characteristics**

| PatientStudy# | Gender | RAF265 Response | Mutation | Survival from DX | Survival fromBX | Status | Location of Primary | Subtype Of Primary Lesion | Breslo mm | Clark's Level | Ulceration | Treatment Prior to Surgery |           |       |
|---------------|--------|-----------------|----------|------------------|-----------------|--------|---------------------|---------------------------|-----------|---------------|------------|----------------------------|-----------|-------|
|               |        |                 |          |                  |                 |        |                     |                           |           |               |            | Immuno                     | Radiation | Chemo |
| V05           | M      | Yes             | V600E    | 8 mo             | 7 mo            | DOD    | Ankle               | Nodular                   | 6.5       | V             | Yes        | N                          | Y         | N     |
| V09           | M      | N/A             | V600E    | 24 mo            |                 | DOD    | unknown             | Unknown                   |           |               |            | Y                          | Y         | N     |
| V12           | M      | No              | V600E    | 18 mo            | 12 mo           | DOD    | leg                 | Superficial Spreading     | 3.2       | IV            | Yes        | Y                          | Y         | Y     |
| V13,15        | M      | No              | V600K    | 85+ mo           | 42+ mo          | Alive  | Back                | Melanoma Not Specified    | 2.1       | II            | No         | N                          | Y         | Y     |
| V18           | M      | No              | V600E    | 62 mo            | 6-7 mo          | DOD    | Back                | Nodular                   | 3.4       | IV            | Yes        | Y                          | Y         | N     |
| V19           | M      | Yes             | WT       | 36+ mo           | 33+ mo          | Alive  | Scalp               | Nodular                   | 7         | V             | Yes        | Y                          | Y         | Y     |
| V23           | M      | No              | V600E    | 15 mo            | 6 mo            | DOD    | Abdomen             | Nodular                   | 6.7       | IV            | Yes        | N                          | Y         | N     |
| V24           | F      | No              | WT       | 6 mo             | 3 mo            | DOD    | Leg                 | Superficial Spreading     | 2.2       | III           | Yes        | Y                          | N         | N     |
| V25           | M      | No              | WT       | 12 mo            | 9 mo            | DOD    | Shoulder            | Lentigo Malignant         | 0.2       | II            | No         | N                          | Y         | N     |
| V26           | F      | N/A             | V600E    | 16 mo            | 3 mo            | DOD    | Unknown             | Unknown                   |           |               |            | N                          | Y         | N     |
| V27           | M      | Yes             | V600E    | 26+ mo           | 25+ mo          | Alive  | Unknown             | Unknown                   |           |               |            | N                          | Y         | N     |
| V28           | F      | Yes             | cKit     | 37 mo            | 27 mo           | DOD    | Unknown             | Melanoma Not Specified    | 0.4       | II            |            |                            | N         |       |
| V29           | M      | No              | V600E    | 41 mo            | 18 mo           | DOD    | Unknown             | Unknown                   |           |               |            | Y                          | Y         | Y     |
| V30           | F      | No              | V600E    | 13 mo            | 11 mo           | DOD    | Heel                | Melanoma Not Specified    | 10        | V             | Yes        | N                          | N         | Y     |
| V32           | M      | No              | WT       | 9 mo             | 3 mo            | DOD    | Toe                 | Nodular                   | 3.4       | IV            | No         | Y                          | N         | N     |
| V33           | F      | Yes             | WT       | 14 mo            | 11 mo           | Alive  |                     | Unknown                   |           |               |            |                            |           |       |
| V34           | M      | Yes             | NRasQ61R | 66+ mo           | 20+ mo          | Alive  |                     | Unknown                   |           |               |            | Y                          |           |       |
| V35           | M      | Yes             | WT       | 19+ mo           | 19+ mo          | Alive  |                     | Unknown                   |           |               |            | N                          |           |       |

**Supplemental Table 2: Mutational Profile of Human Melanoma Tumors**

| <b>Sample</b> | <b>BRAF</b>            | <b>CTNNB1</b> | <b>GNAQ</b> | <b>GNA11</b> | <b>KIT</b>      | <b>NRAS</b> |
|---------------|------------------------|---------------|-------------|--------------|-----------------|-------------|
| <b>V05</b>    | V600E; c1799T>A        | WT            | WT          | WT           | WT              | WT          |
| <b>V12</b>    | V600E; c1799T>A        | WT            | WT          | WT           | WT              | WT          |
| <b>V13</b>    | V600K; c1798_1799GT>AA | WT            | WT          | WT           | WT              | WT          |
| <b>V15</b>    | V600K; c1798_1799GT>AA | WT            | WT          | WT           | WT              | WT          |
| <b>V18</b>    | V600E; c1799T>A        | WT            | WT          | WT           | WT              | WT          |
| <b>V19</b>    | WT                     | WT            | WT          | WT           | WT              | WT          |
| <b>V23</b>    | V600E; c1799T>A        | WT            | WT          | WT           | WT              | WT          |
| <b>V24</b>    | WT                     | WT            | WT          | WT           | WT              | WT          |
| <b>V25</b>    | WT                     | WT            | WT          | WT           | WT              | WT          |
| <b>V27</b>    | V600E; c1799T>A        | WT            | WT          | WT           | WT              | WT          |
| <b>V28</b>    | WT                     | WT            | WT          | WT           | pL576P;c1727T>C | WT          |
| <b>V29</b>    | V600E; c1799T>A        | WT            | WT          | WT           | WT              | WT          |
| <b>V30</b>    | V600E; c1799T>A        | WT            | WT          | WT           | WT              | WT          |
| <b>V32</b>    | WT                     | WT            | WT          | WT           | WT              | WT          |
| <b>V33</b>    | WT                     | WT            | WT          | WT           | WT              | WT          |
| <b>V34</b>    | WT                     | WT            | WT          | WT           | WT              | p.Q61R;c18  |
| <b>V35</b>    | WT                     | WT            | WT          | WT           | WT              | WT          |



**Supplementary Table S3: Genes Differentially Expressed in BRAF Mutant Melanoma Tumors Compared to BRAF WT Tumors**

| <u>Gene.Symbol</u> | <u>Description</u>                                                                        | <u>Log FC</u> | <u>Adjusted P value</u> | <u>Biological.Process</u>                                                                                                                         | GO.Cellular Component.Term                                                                                                                          | GO.Molecular Function.ID                                              | GO.Molecular.Function.Term                                                                                                                                                                                                   |
|--------------------|-------------------------------------------------------------------------------------------|---------------|-------------------------|---------------------------------------------------------------------------------------------------------------------------------------------------|-----------------------------------------------------------------------------------------------------------------------------------------------------|-----------------------------------------------------------------------|------------------------------------------------------------------------------------------------------------------------------------------------------------------------------------------------------------------------------|
| APBA2              | amyloid beta (A4) precursor protein-binding, family A, member 2 (X11-like) (APBA2), mRNA. | 1.19          | 0.001                   | nervous system development // protein transport                                                                                                   | ---                                                                                                                                                 | GO:0005515 // GO:0005515                                              | protein binding // protein binding                                                                                                                                                                                           |
| IGFBP2             | insulin-like growth factor binding protein 2, 36kDa (IGFBP2), mRNA.                       | 1.41          | 0.002                   | regulation of cell growth // signal transduction                                                                                                  | extracellular region // extracellular space                                                                                                         | GO:0005520 // GO:0031994 // GO:0031995                                | insulin-like growth factor binding // insulin-like growth factor I binding // insulin-like growth factor II binding                                                                                                          |
| PTPRG              | protein tyrosine phosphatase, receptor type, G (PTPRG), mRNA.                             | 1.10          | 0.002                   | protein amino acid dephosphorylation // one-carbon compound metabolic process // transmembrane receptor protein tyrosine kinase signaling pathway | integral to plasma membrane // membrane                                                                                                             | GO:0004089 // GO:0005001 // GO:0008270 // GO:0016787                  | carbonate dehydratase activity // transmembrane receptor protein tyrosine phosphatase activity // zinc ion binding // hydrolase activity                                                                                     |
| DZIP1              | DAZ interacting protein 1 (DZIP1), transcript variant 2, mRNA.                            | 1.34          | 0.002                   | multicellular organismal development // germ cell development // spermatogenesis // cell differentiation                                          | intracellular // nucleus // cytoplasm // protein complex                                                                                            | GO:0005515 // GO:0008270 // GO:0046872                                | protein binding // zinc ion binding // metal ion binding                                                                                                                                                                     |
| FADS2              | fatty acid desaturase 2 (FADS2), mRNA.                                                    | 1.27          | 0.003                   | lipid metabolic process // unsaturated fatty acid biosynthetic process // transport // oxidation reduction                                        | membrane fraction // endoplasmic reticulum // endoplasmic reticulum membrane // integral to plasma membrane // membrane plasma membrane // membrane | GO:0005506 // GO:0016491 // GO:0016717 // GO:0020037                  | iron ion binding // oxidoreductase activity // oxidoreductase activity, acting on paired donors, with oxidation of a pair of donors resulting in the reduction of molecular oxygen to two molecules of water // heme binding |
| FRAS1              | Fraser syndrome 1 (FRAS1), mRNA.                                                          | 1.30          | 0.005                   | cell communication                                                                                                                                | plasma membrane // integral to membrane                                                                                                             | GO:0005509                                                            | calcium ion binding                                                                                                                                                                                                          |
| SRGAP1             | SLIT-ROBO Rho GTPase activating protein 1 (SRGAP1), mRNA.                                 | 1.01          | 0.018                   | signal transduction                                                                                                                               | intracellular                                                                                                                                       | GO:0005096                                                            | GTPase activator activity                                                                                                                                                                                                    |
| CYP7B1             | cytochrome P450, family 7, subfamily B, polypeptide 1 (CYP7B1), mRNA.                     | 1.29          | 0.020                   | lipid metabolic process // bile acid biosynthetic process // steroid metabolic process // cholesterol metabolic process // oxidation reduction    | endoplasmic reticulum // endoplasmic reticulum membrane //                                                                                          | GO:0004497 // GO:0005506 // GO:0008396 // GO:0008396 // GO:0009055 // | monooxygenase activity // iron ion binding // oxysterol 7-alpha-hydroxylase activity // oxysterol 7-alpha-hydroxylase activity // electron carrier activity // heme                                                          |

|         |                                                                                                                            |       |      |                                                                                                                                                                                                                                                                                                             |                                                                                       |                                                                                                |                                                                                                                                                                                                                               |
|---------|----------------------------------------------------------------------------------------------------------------------------|-------|------|-------------------------------------------------------------------------------------------------------------------------------------------------------------------------------------------------------------------------------------------------------------------------------------------------------------|---------------------------------------------------------------------------------------|------------------------------------------------------------------------------------------------|-------------------------------------------------------------------------------------------------------------------------------------------------------------------------------------------------------------------------------|
|         |                                                                                                                            |       |      |                                                                                                                                                                                                                                                                                                             | endoplasmic reticulum membrane // microsome // membrane                               | GO:0020037 // GO:0033783 // GO:0046872                                                         | binding // 25-hydroxycholesterol 7alpha-hydroxylase activity // metal ion binding                                                                                                                                             |
| COL11A1 | collagen, type XI, alpha 1 (COL11A1), transcript variant A, mRNA.                                                          | 1.51  | 0.03 | cartilage condensation // phosphate transport // visual perception // sensory perception of sound // extracellular matrix organization and biogenesis                                                                                                                                                       | extracellular region // collagen // collagen type XI // cytoplasm                     | GO:0005201 // GO:0005201 // GO:0030674                                                         | extracellular matrix structural constituent // extracellular matrix structural constituent // protein binding, bridging                                                                                                       |
| IFIT1   | interferon-induced protein with tetratricopeptide repeats 1 (IFIT1), transcript variant 2, mRNA.                           | -1.43 | 0.02 | biological_process                                                                                                                                                                                                                                                                                          | cytoplasm                                                                             | GO:0005488                                                                                     | binding                                                                                                                                                                                                                       |
| CPEB2   | cytoplasmic polyadenylation element binding protein 2 (CPEB2), transcript variant B, mRNA.                                 | -1.05 | 0.02 | regulation of translation                                                                                                                                                                                                                                                                                   | cytoplasm                                                                             | GO:0000166 // GO:0003723                                                                       | nucleotide binding // RNA binding                                                                                                                                                                                             |
| NEDD4L  | neural precursor cell expressed, developmentally down-regulated 4-like (NEDD4L), mRNA.                                     | -1,16 | 0.02 | protein modification process // sodium ion transport // cellular sodium ion homeostasis // excretion // response to metal ion // protein ubiquitination // water homeostasis // regulation of protein catabolic process // interspecies interaction between organisms // positive regulation of endocytosis | intracellular // cytoplasm                                                            | GO:0004842 // GO:0005515 // GO:0005515 // GO:0016874 // GO:0017080                             | ubiquitin-protein ligase activity // protein binding // protein binding // ligase activity // sodium channel regulator activity                                                                                               |
| PRUNE2  | prune homolog 2 (Drosophila) (PRUNE2), transcript variant 1, mRNA.                                                         | -1.29 | 0.02 | apoptosis // induction of apoptosis // G1 phase                                                                                                                                                                                                                                                             | cytoplasm                                                                             | GO:0016491 // GO:0030145 // GO:0046872 // GO:0046914                                           | oxidoreductase activity // manganese ion binding // metal ion binding // transition metal ion binding                                                                                                                         |
| PPM2C   | protein phosphatase 2C, magnesium-dependent, catalytic subunit (PPM2C), nuclear gene encoding mitochondrial protein, mRNA. | -1.00 | 0.01 | protein amino acid dephosphorylation                                                                                                                                                                                                                                                                        | mitochondrion // mitochondrial matrix // protein serine/threonine phosphatase complex | GO:0000287 // GO:0003824 // GO:0004722 // GO:0004741 // GO:0005509 // GO:0005509 // GO:0016787 | magnesium ion binding // catalytic activity // protein serine/threonine phosphatase activity // [pyruvate dehydrogenase (lipoamide)] phosphatase activity // calcium ion binding // calcium ion binding // hydrolase activity |
| SYT11   | synaptotagmin XI (SYT11), mRNA.                                                                                            | -1.10 | 0.01 | transport                                                                                                                                                                                                                                                                                                   | synaptic vesicle // membrane // integral to                                           | GO:0005215 // GO:0005509 // GO:0005544                                                         | transporter activity // calcium ion binding // calcium-dependent phospholipid binding                                                                                                                                         |

|        |                                                                                      |       |      |                                                                                                                                |                                                                             |                                                                                                              |                                                                                                                                                                                                                                            |
|--------|--------------------------------------------------------------------------------------|-------|------|--------------------------------------------------------------------------------------------------------------------------------|-----------------------------------------------------------------------------|--------------------------------------------------------------------------------------------------------------|--------------------------------------------------------------------------------------------------------------------------------------------------------------------------------------------------------------------------------------------|
|        |                                                                                      |       |      |                                                                                                                                | membrane // cell junction // cytoplasmic vesicle // synapse                 |                                                                                                              |                                                                                                                                                                                                                                            |
| MINPP1 | multiple inositol polyphosphate histidine phosphatase, 1 (MINPP1), mRNA.             | -1.30 | 0.01 | polyphosphate metabolic process // bone mineralization                                                                         | endoplasmic reticulum // endoplasmic reticulum lumen                        | GO:0003993 // GO:0004446 // GO:0008969 // GO:0016787 // GO:0034417                                           | acid phosphatase activity // multiple inositol-polyphosphate phosphatase activity // phosphohistidine phosphatase activity // hydrolase activity // bisphosphoglycerate 3-phosphatase activity                                             |
| NR4A3  | nuclear receptor subfamily 4, group A, member 3 (NR4A3), transcript variant 2, mRNA. | -1.06 | 0.01 | transcription // regulation of transcription, DNA-dependent // biological_process                                              | nucleus // nucleus                                                          | GO:0003700 // GO:0003707 // GO:0004879 // GO:0004887 // GO:0005488 // GO:0008270 // GO:0043565 // GO:0046872 | transcription factor activity // steroid hormone receptor activity // ligand-dependent nuclear receptor activity // thyroid hormone receptor activity // binding // zinc ion binding // sequence-specific DNA binding // metal ion binding |
| ITGB8  | integrin, beta 8 (ITGB8), mRNA.                                                      | -2.22 | 0.01 | ganglioside metabolic process // cell adhesion // cell adhesion // cell-matrix adhesion // integrin-mediated signaling pathway | integrin complex // integrin complex // membrane // integral to membrane    | GO:0004872 // GO:0005488 // GO:0005515                                                                       | receptor activity // binding // protein binding                                                                                                                                                                                            |
| OAS1   | 2',5'-oligoadenylate synthetase 1, 40/46kDa (OAS1), transcript variant 1, mRNA.      | -1.31 | 0.01 | nucleobase, nucleoside, nucleotide and nucleic acid metabolic process // immune response                                       | nucleus // cytoplasm // mitochondrion // endoplasmic reticulum // microsome | GO:0003723 // GO:0005524 // GO:0016740 // GO:0016779                                                         | RNA binding // ATP binding // transferase activity // nucleotidyltransferase activity                                                                                                                                                      |
| LYPD1  | LY6/PLAUR domain containing 1 (LYPD1), transcript variant 1, mRNA.                   | -1.43 | 0.01 | ---                                                                                                                            | plasma membrane // anchored to membrane                                     | ---                                                                                                          | ---                                                                                                                                                                                                                                        |
| SFT2D2 | SFT2 domain containing 2 (SFT2D2), mRNA.                                             | -1.06 | 0.01 | protein transport                                                                                                              | membrane // integral to membrane                                            | ---                                                                                                          | ---                                                                                                                                                                                                                                        |
| NR4A1  | nuclear receptor subfamily 4, group A, member 1 (NR4A1), transcript variant 1, mRNA. | -1.11 | 0.01 | transcription // regulation of transcription, DNA-dependent // signal transduction                                             | nucleus // nucleoplasm                                                      | GO:0003700 // GO:0003707 // GO:0004879 // GO:0008270 // GO:0043565 // GO:0046872                             | transcription factor activity // steroid hormone receptor activity // ligand-dependent nuclear receptor activity // zinc ion binding // sequence-specific DNA binding // metal ion binding                                                 |
| AGPAT9 | 1-acylglycerol-3-phosphate O-acyltransferase 9                                       | -1.83 | 0.01 | metabolic process // phospholipid biosynthetic process                                                                         | endoplasmic reticulum // endoplasmic reticulum                              | GO:0003841 // GO:0008415 // GO:0016740                                                                       | 1-acylglycerol-3-phosphate O-acyltransferase activity // acyltransferase activity // transferase activity                                                                                                                                  |

|         |                                                                                                 |       |       |                                                                                                                                                                                                    |                                                                                                                               |                                                                                                                                                    |                                                                                                                                                                                                                                                                                                 |
|---------|-------------------------------------------------------------------------------------------------|-------|-------|----------------------------------------------------------------------------------------------------------------------------------------------------------------------------------------------------|-------------------------------------------------------------------------------------------------------------------------------|----------------------------------------------------------------------------------------------------------------------------------------------------|-------------------------------------------------------------------------------------------------------------------------------------------------------------------------------------------------------------------------------------------------------------------------------------------------|
|         | (AGPAT9), mRNA.                                                                                 |       |       |                                                                                                                                                                                                    | membrane //<br>membrane //<br>integral to<br>membrane                                                                         |                                                                                                                                                    |                                                                                                                                                                                                                                                                                                 |
| DKK1    | dickkopf homolog<br>1 ( <i>Xenopus laevis</i> )<br>(DKK1), mRNA.                                | -1.73 | 0.006 | multicellular organismal<br>development // negative<br>regulation of Wnt receptor<br>signaling pathway //<br>embryonic limb<br>morphogenesis                                                       | extracellular<br>region // plasma<br>membrane                                                                                 | GO:0004871 //<br>GO:0005515 //<br>GO:0008083 //<br>GO:0050750                                                                                      | signal transducer activity // protein<br>binding // growth factor activity //<br>low-density lipoprotein receptor<br>binding                                                                                                                                                                    |
| PFKFB4  | 6-phosphofructo-<br>2-kinase/fructose-<br>2,6-biphosphatase<br>4 (PFKFB4),<br>mRNA.             | -1.13 | 0.006 | fructose 2,6-bisphosphate<br>metabolic process // fructose<br>2,6-bisphosphate metabolic<br>process // metabolic process                                                                           | cellular compone<br>nt // cytosol                                                                                             | GO:0000166 //<br>GO:0003873 //<br>GO:0003873 //<br>GO:0003873 //<br>GO:0004331 //<br>GO:0005524 //<br>GO:0016301 //<br>GO:0016740 //<br>GO:0016787 | nucleotide binding // 6-<br>phosphofructo-2-kinase activity //<br>6-phosphofructo-2-kinase activity<br>// 6-phosphofructo-2-kinase activity<br>// fructose-2,6-bisphosphate 2-<br>phosphatase activity // ATP<br>binding // kinase activity //<br>transferase activity // hydrolase<br>activity |
| QDPR    | quinoid<br>dihydropteridine<br>reductase<br>(QDPR), mRNA.                                       | -1.21 | 0.005 | amino acid metabolic process<br>// L-phenylalanine catabolic<br>process // tetrahydrobiopterin<br>biosynthetic process //<br>dihydrobiopterin metabolic<br>process // oxidation reduction          | cytoplasm                                                                                                                     | GO:0004155 //<br>GO:0005488 //<br>GO:0009055 //<br>GO:0016491                                                                                      | 6,7-dihydropteridine reductase<br>activity // binding // electron<br>carrier activity // oxidoreductase<br>activity                                                                                                                                                                             |
| GPRC5A  | G protein-coupled<br>receptor, family C,<br>group 5, member<br>A (GPRC5A),<br>mRNA.             | -1.07 | 0.005 | signal transduction // G-<br>protein coupled receptor<br>protein signaling pathway                                                                                                                 | plasma<br>membrane //<br>integral to plasma<br>membrane //<br>cytoplasmic<br>vesicle<br>membrane //<br>cytoplasmic<br>vesicle | GO:0004872 //<br>GO:0004930                                                                                                                        | receptor activity // G-protein<br>coupled receptor activity                                                                                                                                                                                                                                     |
| SLC17A5 | solute carrier<br>family 17<br>(anion/sugar<br>transporter),<br>member 5<br>(SLC17A5),<br>mRNA. | -1.09 | 0.005 | transport // anion transport                                                                                                                                                                       | membrane<br>fraction //<br>lysosomal<br>membrane //<br>integral to plasma<br>membrane //<br>membrane                          | GO:0005215 //<br>GO:0005351 //<br>GO:0015293                                                                                                       | transporter activity //<br>sugar:hydrogen symporter activity<br>// symporter activity                                                                                                                                                                                                           |
| IFI6    | interferon, alpha-<br>inducible protein 6<br>(IFI6), transcript<br>variant 1, mRNA.             | -1.58 | 0.005 | release of cytochrome c from<br>mitochondria // anti-apoptosis<br>// immune response //<br>negative regulation of<br>caspase activity // negative<br>regulation of mitochondrial<br>depolarization | mitochondrion //<br>membrane //<br>integral to<br>membrane                                                                    | GO:0005515                                                                                                                                         | protein binding                                                                                                                                                                                                                                                                                 |
| WIPI1   | WD repeat<br>domain,<br>phosphoinositide<br>interacting 1<br>(WIPI1), mRNA.                     | 1.18  | 0.002 | autophagy // vesicle<br>targeting, trans-Golgi to<br>endosome                                                                                                                                      | autophagic<br>vacuole<br>membrane //<br>cytoplasm //<br>endosome //<br>Golgi apparatus                                        | GO:0005102 //<br>GO:0030331 //<br>GO:0032266 //<br>GO:0050681                                                                                      | receptor binding // estrogen<br>receptor binding //<br>phosphatidylinositol 3-phosphate<br>binding // androgen receptor<br>binding                                                                                                                                                              |

|          |                                                                                         |       |       |                                                                                                                                                                |                                                                                                                                                                                                                                                                         |                                                                    |                                                                                                                                                      |
|----------|-----------------------------------------------------------------------------------------|-------|-------|----------------------------------------------------------------------------------------------------------------------------------------------------------------|-------------------------------------------------------------------------------------------------------------------------------------------------------------------------------------------------------------------------------------------------------------------------|--------------------------------------------------------------------|------------------------------------------------------------------------------------------------------------------------------------------------------|
|          |                                                                                         |       |       |                                                                                                                                                                | // trans-Golgi network // endosome membrane // cytoplasmic vesicle // pre-autophagosomal structure membrane                                                                                                                                                             |                                                                    |                                                                                                                                                      |
| L1CAM    | L1 cell adhesion molecule (L1CAM), transcript variant 1, mRNA.                          | -1.74 | 0.002 | cell adhesion // multicellular organismal development // nervous system development // cell differentiation                                                    | plasma membrane // integral to membrane                                                                                                                                                                                                                                 | GO:0005515                                                         | protein binding                                                                                                                                      |
| SLC16A6  | solute carrier family 16, member 6 (monocarboxylic acid transporter 7) (SLC16A6), mRNA. | -2.76 | 0.002 | transport // monocarboxylic acid transport                                                                                                                     | membrane fraction // plasma membrane // integral to plasma membrane // integral to membrane                                                                                                                                                                             | GO:0005215 // GO:0008028 // GO:0015293                             | transporter activity // monocarboxylic acid transmembrane transporter activity // symporter activity                                                 |
| SLC6A15  | solute carrier family 6, member 15 (SLC6A15), transcript variant 1, mRNA.               | -1.91 | 0.002 | neurotransmitter transport // neurotransmitter transport                                                                                                       | integral to plasma membrane // membrane                                                                                                                                                                                                                                 | GO:0005328 // GO:0015293                                           | neurotransmitter:sodium symporter activity // symporter activity                                                                                     |
| ATP6V0D2 | ATPase, H+ transporting, lysosomal 38kDa, V0 subunit d2 (ATP6V0D2), mRNA.               | -1.20 | 0.002 | ion transport // proton transport                                                                                                                              | proton-transporting two-sector ATPase complex                                                                                                                                                                                                                           | GO:0016787 // GO:0046961                                           | hydrolase activity // hydrogen ion transporting ATPase activity, rotational mechanism                                                                |
| CAPG     | capping protein (actin filament), gelsolin-like (CAPG), mRNA.                           | -1.39 | 0.002 | protein complex assembly // cell projection biogenesis // barbed-end actin filament capping                                                                    | nucleus // cytoplasm // F-actin capping protein complex // melanosome ruffle // cytoplasm // cytosol // cytoskeleton // actin filament // microvillus // membrane // apical plasma membrane // extrinsic to membrane // extrinsic to membrane // filopodium // cortical | GO:0003779                                                         | actin binding                                                                                                                                        |
| EZR      | ezrin (EZR), transcript variant 1, mRNA.                                                | -1.30 | 0.001 | cytoskeletal anchoring at plasma membrane // leukocyte adhesion // regulation of cell shape // membrane to membrane docking // actin filament bundle formation |                                                                                                                                                                                                                                                                         | GO:0005198 // GO:0008092 // GO:0043621 // GO:0050839 // GO:0051015 | structural molecule activity // cytoskeletal protein binding // protein self-association // cell adhesion molecule binding // actin filament binding |

|         |                                                                                         |       |         |                                                                                                                   |                                                                 |                                                               |                                                                                                                                                  |
|---------|-----------------------------------------------------------------------------------------|-------|---------|-------------------------------------------------------------------------------------------------------------------|-----------------------------------------------------------------|---------------------------------------------------------------|--------------------------------------------------------------------------------------------------------------------------------------------------|
| IFI27   | interferon, alpha-inducible protein 27 (IFI27), mRNA.                                   | -1.68 | 0.001   | biological_process                                                                                                | cytoskeleton<br>membrane // integral to membrane                | GO:0003674                                                    | molecular_function                                                                                                                               |
| LONRF3  | LON peptidase N-terminal domain and ring finger 3 (LONRF3), transcript variant 1, mRNA. | -1.21 | 0.001   | ATP-dependent proteolysis                                                                                         | ---                                                             | GO:0004176 //<br>GO:0005515 //<br>GO:0008270 //<br>GO:0046872 | ATP-dependent peptidase activity // protein binding // zinc ion binding // metal ion binding                                                     |
| CD109   | CD109 molecule (CD109), mRNA.                                                           | -1.92 | 3.7E-04 | ---                                                                                                               | extracellular region // plasma membrane // anchored to membrane | GO:0004867 //<br>GO:0005515 //<br>GO:0017114                  | serine-type endopeptidase inhibitor activity // protein binding // wide-spectrum protease inhibitor activity                                     |
| CXorf57 | chromosome X open reading frame 57 (CXorf57), mRNA.                                     | -1.32 | 2.4E-04 | ---                                                                                                               | ---                                                             | ---                                                           | ---                                                                                                                                              |
| AVPI1   | arginine vasopressin-induced 1 (AVPI1), mRNA.                                           | -1.48 | 2.4E-04 | activation of MAPK activity // cell cycle                                                                         | ---                                                             | ---                                                           | ---                                                                                                                                              |
| ENTHD1  | ENTH domain containing 1 (ENTHD1), mRNA.                                                | -2.34 | 1.5E-04 | ---                                                                                                               | ---                                                             | ---                                                           | ---                                                                                                                                              |
| DUSP10  | dual specificity phosphatase 10 (DUSP10), transcript variant 1, mRNA.                   | -1.98 | 6.2E-05 | protein amino acid dephosphorylation // protein amino acid dephosphorylation // response to stress // JNK cascade | nucleus // cytoplasm                                            | GO:0004725 //<br>GO:0016787 //<br>GO:0016791 //<br>GO:0017017 | protein tyrosine phosphatase activity // hydrolase activity // phosphatase activity // MAP kinase tyrosine/serine/threonine phosphatase activity |

**SUPPLEMENTAL TABLE S4: GSEA ANALYSIS**

The \* indicates those genes also identified in the Dry study showing resistance or sensitivity to MAPK inhibitors

|                 | <b>Genes Enriched in BRAF<sup>WT</sup> RAF-265 Responsive Tumors</b>              |
|-----------------|-----------------------------------------------------------------------------------|
|                 | <b>Gene Title</b>                                                                 |
| <b>ACADM</b>    | acyl-Coenzyme A dehydrogenase, C-4 to C-12 straight chain                         |
| <b>ACAT1</b>    | acetyl-Coenzyme A acetyltransferase 1 (acetoacetyl Coenzyme A thiolase)           |
| <b>ADRBK2</b>   | adrenergic, beta, receptor kinase 2                                               |
| <b>AHR</b>      | aryl hydrocarbon receptor                                                         |
| <b>ALDOC</b>    | aldolase C, fructose-bisphosphate                                                 |
| <b>ANKMY2</b>   | ankyrin repeat and MYND domain containing 2                                       |
| <b>APAF1</b>    | apoptotic peptidase activating factor                                             |
| <b>BAAT</b>     | bile acid Coenzyme A: amino acid N-acyltransferase (glycine N-choloyltransferase) |
| <b>BIRC2</b>    | baculoviral IAP repeat-containing 2                                               |
| <b>*BNIP3</b>   | BCL2/adenovirus E1B 19kDa interacting protein 3                                   |
| <b>C11ORF54</b> | chromosome 11 open reading frame 54                                               |
| <b>CALB2</b>    | calbindin 2, 29kDa (calretinin)                                                   |
| <b>CASD1</b>    | CAS1 domain containing 1                                                          |
| <b>CASP1</b>    | caspase 1, apoptosis-related cysteine peptidase (interleukin 1, beta, convertase) |
| <b>CD36</b>     | CD36 molecule (thrombospondin receptor)                                           |
| <b>CDH2</b>     | cadherin 2, type 1, N-cadherin (neuronal)                                         |
| <b>CEPT1</b>    | choline/ethanolamine phosphotransferase 1                                         |
| <b>CNBP</b>     | CCHC-type zinc finger, nucleic acid binding protein                               |
| <b>CPB2</b>     | carboxypeptidase B2 (plasma, carboxypeptidase U)                                  |
| <b>CREB1</b>    | cAMP responsive element binding protein 1                                         |
| <b>CYCS</b>     | cytochrome c, somatic                                                             |
| <b>DDX10</b>    | DEAD (Asp-Glu-Ala-Asp) box polypeptide 10                                         |
| <b>DHCR24</b>   | 24-dehydrocholesterol reductase                                                   |

|                     |                                                                                                    |
|---------------------|----------------------------------------------------------------------------------------------------|
| <b>DLEU2</b>        | <b>deleted in lymphocytic leukemia, 2</b>                                                          |
| <b>DMD</b>          | <b>dystrophin (muscular dystrophy, Duchenne and Becker types)</b>                                  |
| <b>DNMBP</b>        | <b>dynamain binding protein</b>                                                                    |
| <b>FAS</b>          | <b>Fas (TNF receptor superfamily, member 6)</b>                                                    |
| <b>FBP1</b>         | <b>fructose-1,6-bisphosphatase 1</b>                                                               |
| <b>FGFR1OP2</b>     | <b>FGFR1 oncogene partner 2</b>                                                                    |
| <b>FN1</b>          | <b>fibronectin 1</b>                                                                               |
| <b>GLRA2</b>        | <b>glycine receptor, alpha 2</b>                                                                   |
| <b>HMGCL</b>        | <b>3-hydroxymethyl-3-methylglutaryl-Coenzyme A lyase (hydroxymethylglutaricaciduria)</b>           |
| <b>HMGCS1</b>       | <b>3-hydroxy-3-methylglutaryl-Coenzyme A synthase 1 (soluble)</b>                                  |
| <b>HMOX1</b>        | <b>heme oxygenase (decycling) 1</b>                                                                |
| <b>HSPB1</b>        | <b>heat shock 27kDa protein 1</b>                                                                  |
| <b>IL1A</b>         | <b>interleukin 1, alpha</b>                                                                        |
| <b>JRKL</b>         | <b>jerky homolog-like (mouse)</b>                                                                  |
| <b>KIF11</b>        | <b>kinesin family member 11</b>                                                                    |
| <b>KLHL9</b>        | <b>kelch-like 9 (Drosophila)</b>                                                                   |
| <b>LPHN3</b>        | <b>latrophilin 3</b>                                                                               |
| <b>LPL</b>          | <b>lipoprotein lipase</b>                                                                          |
| <b>MEI</b>          | <b>malic enzyme 1, NADP(+)-dependent, cytosolic</b>                                                |
| <b>NAPIL-1</b>      | <b>nucleosome assembly protein 1-like 1</b>                                                        |
| <b>NEB</b>          | <b>nebulin</b>                                                                                     |
| <b>NEK7</b>         | <b>NIMA (never in mitosis gene a)-related kinase 7</b>                                             |
| <b>PAH</b>          | <b>phenylalanine hydroxylase</b>                                                                   |
| <b>PICALM</b>       | <b>phosphatidylinositol binding clathrin assembly protein</b>                                      |
| <b>PLCB1</b>        | <b>phospholipase C, beta 1 (phosphoinositide-specific)</b>                                         |
| <b>PPMIA (PP2c)</b> | <b>protein phosphatase 1A (formerly 2C), magnesium-dependent, alpha isoform</b>                    |
| <b>PPP3CA</b>       | <b>protein phosphatase 3 (formerly 2B), catalytic subunit, alpha isoform (calcineurin A alpha)</b> |
| <b>PPP3CA</b>       | <b>protein phosphatase 3 (formerly 2B), catalytic subunit, alpha isoform (calcineurin A alpha)</b> |
| <b>PRKACB</b>       | <b>protein kinase, cAMP-dependent, catalytic, beta</b>                                             |
| <b>PRKAR2B</b>      | <b>protein kinase, cAMP-dependent, regulatory, type II, beta</b>                                   |
| <b>RAF1</b>         | <b>v-raf-1 murine leukemia viral oncogene homolog 1</b>                                            |
| <b>RAP2A</b>        | <b>RAP2A, member of RAS oncogene family</b>                                                        |



|                 |                                                                                                      |
|-----------------|------------------------------------------------------------------------------------------------------|
| <b>RMD5A</b>    | <b>required for meiotic nuclear division 5 homolog A (S. cerevisiae)</b>                             |
| <b>S100A2</b>   | <b>S100 calcium binding protein A2</b>                                                               |
| <b>SCD</b>      | <b>stearoyl-CoA desaturase (delta-9-desaturase)</b>                                                  |
| <b>SCL38A2</b>  | <b>solute carrier family 38, member 2</b>                                                            |
| <b>SCML2</b>    | <b>sex comb on midleg-like 2 (Drosophila)</b>                                                        |
| <b>SDHD</b>     | <b>succinate dehydrogenase complex, subunit D, integral membrane protein</b>                         |
| <b>SEPP1</b>    | <b>selenoprotein P, plasma, 1</b>                                                                    |
| <b>SFRS11</b>   | <b>splicing factor, arginine/serine-rich 11</b>                                                      |
| <b>SLC4A7</b>   | <b>solute carrier family 4, sodium bicarbonate cotransporter, member 7</b>                           |
| <b>SNX13</b>    | <b>sorting nexin 13</b>                                                                              |
| <b>TIMM17A</b>  | <b>translocase of inner mitochondrial membrane 17 homolog A (yeast)</b>                              |
| <b>TLE4</b>     | <b>transducin-like enhancer of split 4 (E(sp1) homolog, Drosophila)</b>                              |
| <b>TUBB2B</b>   | <b>tubulin, beta 2B</b>                                                                              |
| <b>UBE3A</b>    | <b>ubiquitin protein ligase E3A (human papilloma virus E6-associated protein, Angelman syndrome)</b> |
| <b>VLDLR</b>    | <b>very low density lipoprotein receptor</b>                                                         |
| <b>YTHDC1</b>   | <b>YTH domain containing 1</b>                                                                       |
| <b>ZNF337</b>   | <b>zinc finger protein 337</b>                                                                       |
|                 |                                                                                                      |
|                 | <b>Genes Enriched in BRAF<sup>WT</sup> RAF265 Non-responsive Tumors</b>                              |
| <b>*CLU</b>     | <b>clusterin</b>                                                                                     |
| <b>*ETV4</b>    | <b>ets variant gene 4 (E1A enhancer binding protein, E1AF)</b>                                       |
| <b>*FGFR1</b>   | <b>fibroblast growth factor receptor 1 (fms-related tyrosine kinase 2, Pfeiffer syndrome)</b>        |
| <b>*TRIO</b>    | <b>triple functional domain (PTPRF interacting)</b>                                                  |
| <b>*TYR</b>     | <b>tyrosinase (oculocutaneous albinism IA)</b>                                                       |
| <b>ACTC1</b>    | <b>actin, alpha, cardiac muscle 1</b>                                                                |
| <b>ACTN1</b>    | <b>actinin, alpha 1</b>                                                                              |
| <b>ACVRL1</b>   | <b>activin A receptor type II-like 1</b>                                                             |
| <b>ADA</b>      | <b>adenosine deaminase</b>                                                                           |
| <b>ADAMTSL2</b> | <b>ADAMTS-like 2</b>                                                                                 |
| <b>ADRA1B</b>   | <b>adrenergic, alpha-1B-, receptor</b>                                                               |

|                 |                                                                                               |
|-----------------|-----------------------------------------------------------------------------------------------|
| <b>AES</b>      | <b>amino-terminal enhancer of split</b>                                                       |
| <b>AGRN</b>     | <b>NO INFORMATION</b>                                                                         |
| <b>ALDH4A1</b>  | <b>aldehyde dehydrogenase 4 family, member A1</b>                                             |
| <b>AMH</b>      | <b>anti-Mullerian hormone</b>                                                                 |
| <b>AP3B2</b>    | <b>adaptor-related protein complex 3, beta 2 subunit</b>                                      |
| <b>APOD</b>     | <b>apolipoprotein D</b>                                                                       |
| <b>ARHGDI1A</b> | <b>Rho GDP dissociation inhibitor (GDI) alpha</b>                                             |
| <b>ARHGEF15</b> | <b>Rho guanine nucleotide exchange factor (GEF) 15</b>                                        |
| <b>ATP1A3</b>   | <b>ATPase, Na<sup>+</sup>/K<sup>+</sup> transporting, alpha 3 polypeptide</b>                 |
| <b>ATP5D</b>    | <b>ATP synthase, H<sup>+</sup> transporting, mitochondrial F1 complex, delta subunit</b>      |
| <b>B3GAT3</b>   | <b>beta-1,3-glucuronyltransferase 3 (glucuronosyltransferase I)</b>                           |
| <b>B4GALT7</b>  | <b>xylosylprotein beta 1,4-galactosyltransferase, polypeptide 7 (galactosyltransferase I)</b> |
| <b>BCAP31</b>   | <b>B-cell receptor-associated protein 31</b>                                                  |
| <b>CAPN1</b>    | <b>calpain 1, (mu/l) large subunit</b>                                                        |
| <b>CCDC69</b>   | <b>coiled-coil domain containing 69</b>                                                       |
| <b>CCND1</b>    | <b>cyclin D1</b>                                                                              |
| <b>CD34</b>     | <b>CD34 molecule</b>                                                                          |
| <b>CDA</b>      | <b>cytidine deaminase</b>                                                                     |
| <b>CDK5</b>     | <b>cyclin-dependent kinase 5</b>                                                              |
| <b>CLEC3B</b>   | <b>C-type lectin domain family 3, member B</b>                                                |
| <b>COL6A2</b>   | <b>collagen, type VI, alpha 2</b>                                                             |
| <b>CRHBP</b>    | <b>corticotropin releasing hormone binding protein</b>                                        |
| <b>CRIP1</b>    | <b>cysteine-rich protein 1 (intestinal)</b>                                                   |
| <b>CRMP1</b>    | <b>collapsin response mediator protein 1</b>                                                  |
| <b>CTSH</b>     | <b>cathepsin H</b>                                                                            |
| <b>CYP4F2</b>   | <b>cytochrome P450, family 4, subfamily F, polypeptide 2</b>                                  |
| <b>DAG1</b>     | <b>dystroglycan 1 (dystrophin-associated glycoprotein 1)</b>                                  |
| <b>DPM2</b>     | <b>dolichyl-phosphate mannosyltransferase polypeptide 2, regulatory subunit</b>               |
| <b>DTYMK</b>    | <b>deoxythymidylate kinase (thymidylate kinase)</b>                                           |
| <b>DYNLT1</b>   | <b>dynein, light chain, Tctex-type 1</b>                                                      |
| <b>EFNA2</b>    | <b>ephrin-A2</b>                                                                              |
| <b>EGR1</b>     | <b>early growth response 1</b>                                                                |
| <b>EIF5A</b>    | <b>eukaryotic translation initiation factor 5A</b>                                            |

|                 |                                                                                                    |
|-----------------|----------------------------------------------------------------------------------------------------|
| <b>ENG</b>      | <b>endoglin (Osler-Rendu-Weber syndrome 1)</b>                                                     |
| <b>EPHX1</b>    | <b>epoxide hydrolase 1, microsomal (xenobiotic)</b>                                                |
| <b>FBN1</b>     | <b>fibrillin 1</b>                                                                                 |
| <b>FOLR1</b>    | <b>folate receptor 1 (adult)</b>                                                                   |
| <b>FURIN</b>    | <b>furin (paired basic amino acid cleaving enzyme)</b>                                             |
| <b>FYN</b>      | <b>FYN oncogene related to SRC, FGR, YES</b>                                                       |
| <b>GAK</b>      | <b>cyclin G associated kinase</b>                                                                  |
| <b>GAS2L1</b>   | <b>growth arrest-specific 2 like 1</b>                                                             |
| <b>GAS6</b>     | <b>growth arrest-specific 6</b>                                                                    |
| <b>GDPD5</b>    | <b>glycerophosphodiester phosphodiesterase domain containing 5</b>                                 |
| <b>GJB1</b>     | <b>gap junction protein, beta 1, 32kDa (connexin 32, Charcot-Marie-Tooth neuropathy, X-linked)</b> |
| <b>GPR56</b>    | <b>G protein-coupled receptor 56</b>                                                               |
| <b>GPRC5A</b>   | <b>G protein-coupled receptor, family C, group 5, member A</b>                                     |
| <b>GSTP1</b>    | <b>glutathione S-transferase pi</b>                                                                |
| <b>HES2</b>     | <b>hairy and enhancer of split 2 (Drosophila)</b>                                                  |
| <b>HPRT1</b>    | <b>hypoxanthine phosphoribosyltransferase 1 (Lesch-Nyhan syndrome)</b>                             |
| <b>HRAS</b>     | <b>v-Ha-ras Harvey rat sarcoma viral oncogene homolog</b>                                          |
| <b>HS3ST3A1</b> | <b>heparan sulfate (glucosamine) 3-O-sulfotransferase 3A1</b>                                      |
| <b>HS3ST3B1</b> | <b>heparan sulfate (glucosamine) 3-O-sulfotransferase 3B1</b>                                      |
| <b>HYAL2</b>    | <b>hyaluronoglucosaminidase 2</b>                                                                  |
| <b>IGFBP5</b>   | <b>insulin-like growth factor binding protein 5</b>                                                |
| <b>INPPL1</b>   | <b>inositol polyphosphate phosphatase-like 1</b>                                                   |
| <b>IRS1</b>     | <b>insulin receptor substrate 1</b>                                                                |
| <b>ITGA3</b>    | <b>integrin, alpha 3 (antigen CD49C, alpha 3 subunit of VLA-3 receptor)</b>                        |
| <b>ITPKA</b>    | <b>inositol 1,4,5-trisphosphate 3-kinase A</b>                                                     |
| <b>ITPKB</b>    | <b>inositol 1,4,5-trisphosphate 3-kinase B</b>                                                     |
| <b>KRT17</b>    | <b>keratin 17</b>                                                                                  |
| <b>KRT5</b>     | <b>keratin 5 (epidermolysis bullosa simplex, Dowling-Meara/Kobner/Weber-Cockayne types)</b>        |
| <b>KRT7</b>     | <b>keratin 7</b>                                                                                   |
| <b>LILRA4</b>   | <b>leukocyte immunoglobulin-like receptor, subfamily A (with TM domain), member 4</b>              |
| <b>LMNA</b>     | <b>lamin A/C</b>                                                                                   |

|                |                                                                                                                                                |
|----------------|------------------------------------------------------------------------------------------------------------------------------------------------|
| <b>LOXL1</b>   | <b>lysyl oxidase-like 1</b>                                                                                                                    |
| <b>LY6E</b>    | <b>lymphocyte antigen 6 complex, locus E</b>                                                                                                   |
| <b>MAP3K11</b> | <b>mitogen-activated protein kinase kinase kinase 11</b>                                                                                       |
| <b>MAP4K2</b>  | <b>mitogen-activated protein kinase kinase kinase kinase 2</b>                                                                                 |
| <b>MDK</b>     | <b>midkine (neurite growth-promoting factor 2)</b>                                                                                             |
| <b>MMP14</b>   | <b>matrix metalloproteinase 14 (membrane-inserted)</b>                                                                                         |
| <b>MMP15</b>   | <b>matrix metalloproteinase 15 (membrane-inserted)</b>                                                                                         |
| <b>MTA1</b>    | <b>metastasis associated 1</b>                                                                                                                 |
| <b>MTHFD1</b>  | <b>methylenetetrahydrofolate dehydrogenase (NADP+ dependent) 1, methenyltetrahydrofolate cyclohydrolase, formyltetrahydrofolate synthetase</b> |
| <b>NCDN</b>    | <b>neurochondrin</b>                                                                                                                           |
| <b>NGFR</b>    | <b>nerve growth factor receptor (TNFR superfamily, member 16)</b>                                                                              |
| <b>NR4A1</b>   | <b>nuclear receptor subfamily 4, group A, member 1</b>                                                                                         |
| <b>NRTN</b>    | <b>neurturin</b>                                                                                                                               |
| <b>PCMT1</b>   | <b>protein-L-isoaspartate (D-aspartate) O-methyltransferase</b>                                                                                |
| <b>PECAM1</b>  | <b>platelet/endothelial cell adhesion molecule (CD31 antigen)</b>                                                                              |
| <b>POLR2E</b>  | <b>polymerase (RNA) II (DNA directed) polypeptide E, 25kDa</b>                                                                                 |
| <b>POLR2L</b>  | <b>polymerase (RNA) II (DNA directed) polypeptide L, 7.6kDa</b>                                                                                |
| <b>PPAP2B</b>  | <b>phosphatidic acid phosphatase type 2B</b>                                                                                                   |
| <b>PPM1G</b>   | <b>protein phosphatase 1G (formerly 2C), magnesium-dependent, gamma isoform</b>                                                                |
| <b>PPP3CC</b>  | <b>protein phosphatase 3 (formerly 2B), catalytic subunit, gamma isoform (calcineurin A gamma)</b>                                             |
| <b>PTPRB</b>   | <b>protein tyrosine phosphatase, receptor type, B</b>                                                                                          |
| <b>PTRF</b>    | <b>polymerase I and transcript release factor</b>                                                                                              |
| <b>RAMP2</b>   | <b>receptor (calcitonin) activity modifying protein 2</b>                                                                                      |
| <b>RPL39L</b>  | <b>ribosomal protein L39-like</b>                                                                                                              |
| <b>SEMA6A</b>  | <b>sema domain, transmembrane domain (TM), and cytoplasmic domain, (semaphorin) 6A</b>                                                         |
| <b>SHOX</b>    | <b>short stature homeobox</b>                                                                                                                  |
| <b>SLC02A1</b> | <b>solute carrier organic anion transporter family, member 2A1</b>                                                                             |
| <b>SLC6A7</b>  | <b>solute carrier family 6 (neurotransmitter transporter, L-proline), member 7</b>                                                             |

|                  |                                                                                                |
|------------------|------------------------------------------------------------------------------------------------|
| <b>SPIB</b>      | <b>Spi-B transcription factor (Spi-1/PU.1 related)</b>                                         |
| <b>TEK</b>       | <b>TEK tyrosine kinase, endothelial (venous malformations, multiple cutaneous and mucosal)</b> |
| <b>TGM2</b>      | <b>transglutaminase 2 (C polypeptide, protein-glutamine-gamma-glutamyltransferase)</b>         |
| <b>TIE1</b>      | <b>tyrosine kinase with immunoglobulin-like and EGF-like domains 1</b>                         |
| <b>TIMP1</b>     | <b>TIMP metalloproteinase inhibitor 1</b>                                                      |
| <b>TK1</b>       | <b>thymidine kinase 1, soluble</b>                                                             |
| <b>TLE2</b>      | <b>transducin-like enhancer of split 2 (E(sp1) homolog, Drosophila)</b>                        |
| <b>TYMS</b>      | <b>thymidylate synthetase</b>                                                                  |
| <b>XYLT1</b>     | <b>xylosyltransferase I</b>                                                                    |
| <b>XYLT2</b>     | <b>xylosyltransferase II</b>                                                                   |
| <b>ZBTB7A</b>    | <b>zinc finger and BTB domain containing 7A</b>                                                |
|                  | <b>Genes Enriched in RAF265 Responsive Tumors</b>                                              |
|                  | <b>Regardless of BRAF Mutation Status</b>                                                      |
| <b>*SERPINB1</b> | <b>serpin peptidase inhibitor, clade B (ovalbumin), member 1</b>                               |
| <b>*TRIB1</b>    | <b>tribbles homolog 1 (Drosophila)</b>                                                         |
| <b>AARDC3</b>    | <b>arrestin domain containing 3</b>                                                            |
| <b>ABCF2</b>     | <b>ATP-binding cassette, sub-family F (GCN20), member 2</b>                                    |
| <b>ACTG1</b>     | <b>actin, gamma 1</b>                                                                          |
| <b>ACTR1A</b>    | <b>ARP1 actin-related protein 1 homolog A, cencentractin alpha (yeast)</b>                     |
| <b>AHR</b>       | <b>aryl hydrocarbon receptor</b>                                                               |
| <b>ALDOC</b>     | <b>aldolase C, fructose-bisphosphate</b>                                                       |
| <b>ANXA2</b>     | <b>annexin A2</b>                                                                              |
| <b>AP2M1</b>     | <b>adaptor-related protein complex 2, mu 1 subunit</b>                                         |
| <b>AP3S1</b>     | <b>adaptor-related protein complex 3, sigma 1 subunit</b>                                      |
| <b>API5</b>      | <b>apoptosis inhibitor 5</b>                                                                   |
| <b>ASNS</b>      | <b>asparagine synthetase</b>                                                                   |
| <b>BET1</b>      | <b>BET1 homolog (S. cerevisiae)</b>                                                            |
| <b>C11ORF54</b>  | <b>chromosome 11 open reading frame 54</b>                                                     |
| <b>CAV2</b>      | <b>caveolin 2</b>                                                                              |
| <b>CD36</b>      | <b>CD36 molecule (thrombospondin receptor)</b>                                                 |
| <b>CD55</b>      | <b>CD55 molecule, decay accelerating factor for complement (Cromer blood group)</b>            |
| <b>CDC37L1</b>   | <b>CDC37 cell division cycle 37 homolog (S. cerevisiae)-like 1</b>                             |

|          |                                                                                |
|----------|--------------------------------------------------------------------------------|
| CDH1     | cadherin 1, type 1, E-cadherin (epithelial)                                    |
| CEBPZ    | CCAAT/enhancer binding protein zeta                                            |
| CSAD     | cysteine sulfinic acid decarboxylase                                           |
| CYB5B    | cytochrome b5 type B (outer mitochondrial membrane)                            |
| CYCS     | cytochrome c, somatic                                                          |
| CYP2B6   | cytochrome P450, family 2, subfamily B, polypeptide 6                          |
| CYP2C9   | cytochrome P450, family 2, subfamily C, polypeptide 9                          |
| CYP51A1  | cytochrome P450, family 51, subfamily A, polypeptide 1                         |
| DHCR24   | 24-dehydrocholesterol reductase                                                |
| DLD      | dihydrolipoamide dehydrogenase                                                 |
| EIF2S2   | eukaryotic translation initiation factor 2, subunit 2 beta, 38kDa              |
| ELOVL1   | elongation of very long chain fatty acids (FEN1/Elo2, SUR4/Elo3, yeast)-like 1 |
| ENO2     | enolase 2 (gamma, neuronal)                                                    |
| ETHE1    | ethylmalonic encephalopathy 1                                                  |
| FBP1     | fructose-1,6-bisphosphatase 1                                                  |
| FBP1     | fructose-1,6-bisphosphatase 1                                                  |
| GABRA2   | gamma-aminobutyric acid (GABA) A receptor, alpha 2                             |
| GFPT1    | glutamine-fructose-6-phosphate transaminase 1                                  |
| GOT1     | glutamic-oxaloacetic transaminase 1, soluble (aspartate aminotransferase 1)    |
| GPT2     | glutamic pyruvate transaminase (alanine aminotransferase) 2                    |
| HECTD2   | HECT domain containing 2                                                       |
| HK2      | hexokinase 2                                                                   |
| HMGCS1   | 3-hydroxy-3-methylglutaryl-Coenzyme A synthase 1 (soluble)                     |
|          |                                                                                |
| HMOX1    | heme oxygenase (decycling) 1                                                   |
| HSP90AA1 | heat shock protein 90kDa alpha (cytosolic), class A member 1                   |
| HSPC159  | NO INFORMATION                                                                 |
| IGBP1    | immunoglobulin (CD79A) binding protein 1                                       |
| IGFBP3   | insulin-like growth factor binding protein 3                                   |
| ITGA2    | integrin, alpha 2 (CD49B, alpha 2 subunit of VLA-2 receptor)                   |
| KTN1     | kinectin 1 (kinesin receptor)                                                  |

|        |                                                                  |
|--------|------------------------------------------------------------------|
| LARP4  | La ribonucleoprotein domain family, member 4                     |
| LGALS1 | lectin, galactoside-binding, soluble, 1 (galectin 1)             |
| LPL    | lipoprotein lipase                                               |
| MDH1   | malate dehydrogenase 1, NAD (soluble)                            |
| MDH1   | malate dehydrogenase 1, NAD (soluble)                            |
| ME1    | malic enzyme 1, NADP(+)-dependent, cytosolic                     |
| NFIL3  | nuclear factor, interleukin 3 regulated                          |
| P2RX7  | purinergic receptor P2X, ligand-gated ion channel, 7             |
| PAN3   | PAN3 polyA specific ribonuclease subunit homolog (S. cerevisiae) |
| PDHX   | pyruvate dehydrogenase complex, component X                      |
| PFKM   | phosphofructokinase, muscle                                      |
| PGK1   | phosphoglycerate kinase 1                                        |
| PHKA1  | phosphorylase kinase, alpha 1 (muscle)                           |
| PIK3C3 | phosphoinositide-3-kinase, class 3                               |
| PIK3CA | phosphoinositide-3-kinase, catalytic, alpha polypeptide          |
| PK1    | phosphoglycerate kinase 1                                        |
| PLAG1  | pleiomorphic adenoma gene 1                                      |
| PLD3   | phospholipase D family, member 3                                 |
| PRDX1  | peroxiredoxin 1                                                  |
| PSMD8  | proteasome (prosome, macropain) 26S subunit, non-ATPase, 8       |
| PTCH1  | patched homolog 1 (Drosophila)                                   |
| RAB10  | RAB10, member RAS oncogene family                                |
| RAB11A | RAB11A, member RAS oncogene family                               |
| RAB1A  | RAB1A, member RAS oncogene family                                |
| RAB27A | RAB27A, member RAS oncogene family                               |
| RAB5A  | RAB5A, member RAS oncogene family                                |
| RAB6A  | RAB6A, member RAS oncogene family                                |
| RAB9A  | NO INFORMATION                                                   |
| REEP5  | receptor accessory protein 5                                     |
| RHEB   | Ras homolog enriched in brain                                    |
| SACMIL | SAC1 suppressor of actin mutations 1-like (yeast)                |
| SARS   | seryl-tRNA synthetase                                            |
| SC4MOL | sterol-C4-methyl oxidase-like                                    |
| SCD    | stearoyl-CoA desaturase (delta-9-desaturase)                     |

|          |                                                                                        |
|----------|----------------------------------------------------------------------------------------|
| SDHB     | succinate dehydrogenase complex, subunit B, iron sulfur (lp)                           |
| SLCOA1   | solute carrier family 20 (phosphate transporter), member 1                             |
| SNAI2    | snail homolog 2 (Drosophila)                                                           |
| SQLE     | squalene epoxidase                                                                     |
| UBT2B10  | UDP glucuronosyltransferase 2 family, polypeptide B10                                  |
| UGDH     | UDP-glucose dehydrogenase                                                              |
| VLDLR    | very low density lipoprotein receptor                                                  |
| XBP1     | X-box binding protein 1                                                                |
| XPOT     | exportin, tRNA (nuclear export receptor for tRNAs)                                     |
|          |                                                                                        |
|          | <b>Genes Enriched in RAF-265 Non-responsive Tumors</b>                                 |
|          | <b>Regardless of BRAF Mutation Status</b>                                              |
| *CLU     | clusterin                                                                              |
| *COL5A1  | collagen, type V, alpha 1                                                              |
| *ERBB3   | v-erb-b2 erythroblastic leukemia viral oncogene homolog 3 (avian)                      |
| *FGFR1   | fibroblast growth factor receptor 1 (fms-related tyrosine kinase 2, Pfeiffer syndrome) |
| *FZD2    | frizzled homolog 2 (Drosophila)                                                        |
| *TRIO    | triple functional domain (PTPRF interacting)                                           |
| *TYR     | tyrosinase (oculocutaneous albinism IA)                                                |
| ACTA1    | actin, alpha 1, skeletal muscle                                                        |
| ACTC1    | actin, alpha, cardiac muscle 1                                                         |
| ACTN3    | actinin, alpha 3                                                                       |
| ADAMTSL2 | ADAMTS-like 2                                                                          |
| ARHGEF15 | Rho guanine nucleotide exchange factor (GEF) 15                                        |
| ARID1A   | AT rich interactive domain 1A (SWI- like)                                              |
| ASS1     | argininosuccinate synthetase 1                                                         |
| ATP2A1   | ATPase, Ca <sup>++</sup> transporting, cardiac muscle, fast twitch 1                   |
| BIN1     | bridging integrator 1                                                                  |
| BRD3     | bromodomain containing 3                                                               |
| CASZ1    | castor homolog 1, zinc finger (Drosophila)                                             |
| CCDC69   | coiled-coil domain containing 69                                                       |
| CCNA2    | cyclin A2                                                                              |
| CCND1    | cyclin D1                                                                              |



|         |                                                                                                    |
|---------|----------------------------------------------------------------------------------------------------|
| CCNE1   | cyclin E1                                                                                          |
| CD34    | CD34 molecule                                                                                      |
| CDKN2A  | cyclin-dependent kinase inhibitor 2A (melanoma, p16, inhibits CDK4)                                |
| CENPA   | centromere protein A                                                                               |
| CENPE   | centromere protein E, 312kDa                                                                       |
| CKM     | creatine kinase, muscle                                                                            |
| CLCN5   | chloride channel 5 (nephrolithiasis 2, X-linked, Dent disease)                                     |
| CLEC3B  | C-type lectin domain family 3, member B                                                            |
| COL11A1 | collagen, type XI, alpha 1                                                                         |
| COL6A1  | collagen, type VI, alpha 1                                                                         |
| COL6A2  | collagen, type VI, alpha 2                                                                         |
| COX6A2  | cytochrome c oxidase subunit VIa polypeptide 2                                                     |
| CRIP1   | cysteine-rich protein 1 (intestinal)                                                               |
| CYP4F2  | cytochrome P450, family 4, subfamily F, polypeptide 2                                              |
| DAAM2   | dishevelled associated activator of morphogenesis 2                                                |
| DBF4    | DBF4 homolog ( <i>S. cerevisiae</i> )                                                              |
| DBH     | dopamine beta-hydroxylase (dopamine beta-monoxygenase)                                             |
| DNMT1   | DNA (cytosine-5-)-methyltransferase 1                                                              |
| DUSP27  | dual specificity phosphatase 27 (putative)                                                         |
| E2F1    | E2F transcription factor 1                                                                         |
| E2F2    | E2F transcription factor 2                                                                         |
| E2F4    | E2F transcription factor 4, p107/p130-binding                                                      |
| E2F4    | E2F transcription factor 2                                                                         |
| EFNA2   | ephrin-A2                                                                                          |
| EFNB1   | ephrin-B1                                                                                          |
| EGFR    | epidermal growth factor receptor (erythroblastic leukemia viral (v-erb-b) oncogene homolog, avian) |
| ENG     | endoglin (Osler-Rendu-Weber syndrome 1)                                                            |
| ENO3    | enolase 3 (beta, muscle)                                                                           |
| ENO3    | enolase 3 (beta, muscle)                                                                           |
| ENPEP   | glutamyl aminopeptidase (aminopeptidase A)                                                         |
| EPHA5   | EPH receptor A5                                                                                    |
| ESR2    | estrogen receptor 2 (ER beta)                                                                      |
| FANCG   | Fanconi anemia, complementation group G                                                            |

|                                                            |                                                                                       |
|------------------------------------------------------------|---------------------------------------------------------------------------------------|
| <b>FBLN1</b>                                               | <b>fibulin 1</b>                                                                      |
| <b>FBXL22</b>                                              | <b>F-box and leucine-rich repeat protein 22</b>                                       |
| <b>FLT3</b>                                                | <b>fms-related tyrosine kinase 3</b>                                                  |
| <b>GAD1</b>                                                | <b>glutamate decarboxylase 1 (brain, 67kDa)</b>                                       |
| <b>GAK</b>                                                 | <b>cyclin G associated kinase</b>                                                     |
| <b>GAS2</b>                                                | <b>growth arrest-specific 2</b>                                                       |
| <b>GAS2L1</b>                                              | <b>growth arrest-specific 2 like 1</b>                                                |
| <b>GAS6</b>                                                | <b>growth arrest-specific 6</b>                                                       |
| <b>GDPD5</b>                                               | <b>glycerophosphodiester phosphodiesterase domain containing 5</b>                    |
| <b>H1C1</b>                                                | <b>hypermethylated in cancer 1</b>                                                    |
| <b>HDC</b>                                                 | <b>histidine decarboxylase</b>                                                        |
| <b>HES2</b>                                                | <b>hairy and enhancer of split 2 (Drosophila)</b>                                     |
|                                                            |                                                                                       |
| <b>HFE2</b>                                                | <b>hemochromatosis type 2 (juvenile)</b>                                              |
| <b>HYAL1</b>                                               | <b>hyaluronoglucosaminidase 1</b>                                                     |
| <b>HYAL2</b>                                               | <b>hyaluronoglucosaminidase 2</b>                                                     |
| <b>ICAM2</b>                                               | <b>intercellular adhesion molecule 2</b>                                              |
| <b>IGFBP5</b>                                              | <b>insulin-like growth factor binding protein 5</b>                                   |
| <b>IL1RL1</b>                                              | <b>interleukin 1 receptor-like 1</b>                                                  |
| <b>IL2RB</b>                                               | <b>interleukin 2 receptor, beta</b>                                                   |
| <b>ITGA9</b>                                               | <b>integrin, alpha 9</b>                                                              |
| <b>ITPKA</b>                                               | <b>inositol 1,4,5-trisphosphate 3-kinase A</b>                                        |
| <b>JUP</b>                                                 | <b>junction plakoglobin</b>                                                           |
| <b>KBTBD5</b>                                              | <b>kelch repeat and BTB (POZ) domain containing 5</b>                                 |
| <b>KL</b>                                                  | <b>klotho</b>                                                                         |
| <b>LDB3</b>                                                | <b>LIM domain binding 3</b>                                                           |
| <b>LILRA4</b>                                              | <b>leukocyte immunoglobulin-like receptor, subfamily A (with TM domain), member 4</b> |
| <b>LRP6</b>                                                | <b>low density lipoprotein receptor-related protein 6</b>                             |
| <b>LTK</b>                                                 | <b>leukocyte tyrosine kinase</b>                                                      |
| <b>MAP3K11</b>                                             | <b>mitogen-activated protein kinase kinase kinase 11</b>                              |
| <b>MAPKBIP2</b><br>(mapkb<br>INTERACTI<br>NG<br>PROTIEN 2) | <b>mitogen-activated protein kinase 8 interacting protein 2</b>                       |

|                 |                                                                                                    |
|-----------------|----------------------------------------------------------------------------------------------------|
| <b>MDF1</b>     | <b>MyoD family inhibitor</b>                                                                       |
| <b>MMP15</b>    | <b>matrix metalloproteinase 15 (membrane-inserted)</b>                                             |
| <b>MMP9</b>     | <b>matrix metalloproteinase 9 (gelatinase B, 92kDa gelatinase, 92kDa type IV collagenase)</b>      |
| <b>MYF6</b>     | <b>myogenic factor 6 (herculin)</b>                                                                |
| <b>MYH3</b>     | <b>myosin, heavy chain 3, skeletal muscle, embryonic</b>                                           |
| <b>MYH3</b>     | <b>myosin, heavy chain 3, skeletal muscle, embryonic</b>                                           |
| <b>MYLPF</b>    | <b>NO INFORMATION</b>                                                                              |
|                 |                                                                                                    |
| <b>MYOM2</b>    | <b>myomesin (M-protein) 2, 165kDa</b>                                                              |
| <b>NCDN</b>     | <b>neurochondrin</b>                                                                               |
| <b>NEIL1</b>    | <b>nei endonuclease VIII-like 1 (E. coli)</b>                                                      |
| <b>PDE1A</b>    | <b>phosphodiesterase 1A, calmodulin-dependent</b>                                                  |
| <b>PGAM2</b>    | <b>phosphoglycerate mutase 2 (muscle)</b>                                                          |
| <b>PIK3CD</b>   | <b>phosphoinositide-3-kinase, catalytic, delta polypeptide</b>                                     |
| <b>PLCB1</b>    | <b>phospholipase C, beta 1 (phosphoinositide-specific)</b>                                         |
| <b>PLCB2</b>    | <b>phospholipase C, beta 2</b>                                                                     |
| <b>PNMT</b>     | <b>phenylethanolamine N-methyltransferase</b>                                                      |
| <b>POLD1</b>    | <b>polymerase (DNA directed), delta 1, catalytic subunit 125kDa</b>                                |
| <b>POU3F4</b>   | <b>POU domain, class 3, transcription factor 4</b>                                                 |
| <b>PPP3CC</b>   | <b>protein phosphatase 3 (formerly 2B), catalytic subunit, gamma isoform (calcineurin A gamma)</b> |
| <b>PRKAG3</b>   | <b>protein kinase, AMP-activated, gamma 3 non-catalytic subunit</b>                                |
| <b>PRL</b>      | <b>prolactin</b>                                                                                   |
| <b>PTPRM</b>    | <b>protein tyrosine phosphatase, receptor type, M</b>                                              |
| <b>PTRF</b>     | <b>polymerase I and transcript release factor</b>                                                  |
| <b>PYGM</b>     | <b>phosphorylase, glycogen; muscle (McArdle syndrome, glycogen storage disease type V)</b>         |
| <b>RAMP2</b>    | <b>receptor (calcitonin) activity modifying protein 2</b>                                          |
| <b>SCRIB</b>    | <b>scribbled homolog (Drosophila)</b>                                                              |
| <b>SEMA6A</b>   | <b>sema domain, transmembrane domain (TM), and cytoplasmic domain, (semaphorin) 6A</b>             |
| <b>SERPINB5</b> | <b>serpin peptidase inhibitor, clade B (ovalbumin), member 5</b>                                   |
| <b>SGCA</b>     | <b>sarcoglycan, alpha (50kDa dystrophin-associated glycoprotein)</b>                               |

|                |                                                                                                |
|----------------|------------------------------------------------------------------------------------------------|
| <b>SLC6A7</b>  | <b>solute carrier family 6 (neurotransmitter transporter, L-proline), member 7</b>             |
| <b>SOX8</b>    | <b>SRY (sex determining region Y)-box 8</b>                                                    |
| <b>SPIB</b>    | <b>Spi-B transcription factor (Spi-1/PU.1 related)</b>                                         |
| <b>SRL</b>     | <b>sarcalumenin</b>                                                                            |
| <b>TEK</b>     | <b>TEK tyrosine kinase, endothelial (venous malformations, multiple cutaneous and mucosal)</b> |
| <b>TH</b>      | <b>tyrosine hydroxylase</b>                                                                    |
| <b>TIE1</b>    | <b>tyrosine kinase with immunoglobulin-like and EGF-like domains 1</b>                         |
| <b>TLE2</b>    | <b>transducin-like enhancer of split 2 (E(sp1) homolog, Drosophila)</b>                        |
| <b>TMEM38A</b> | <b>transmembrane protein 38A</b>                                                               |
| <b>TNNC2</b>   | <b>troponin C type 2 (fast)</b>                                                                |
|                |                                                                                                |
| <b>TNNI2</b>   | <b>troponin I type 2 (skeletal, fast)</b>                                                      |
| <b>TNNT2</b>   | <b>troponin T type 2 (cardiac)</b>                                                             |
|                |                                                                                                |
| <b>TNNT3</b>   | <b>troponin T type 3 (skeletal, fast)</b>                                                      |
| <b>TPH1</b>    | <b>tryptophan hydroxylase 1 (tryptophan 5-monooxygenase)</b>                                   |
| <b>TPM1</b>    | <b>tropomyosin 1 (alpha)</b>                                                                   |
| <b>TPM2</b>    | <b>tropomyosin 2 (beta)</b>                                                                    |
| <b>TTN</b>     | <b>titin</b>                                                                                   |
| <b>UNC45B</b>  | <b>unc-45 homolog B (C. elegans)</b>                                                           |
| <b>USP2</b>    | <b>ubiquitin specific peptidase 2</b>                                                          |
| <b>VIP</b>     | <b>vasoactive intestinal peptide</b>                                                           |
